# Supplementary material
Source: PubMed Central journal article supplement (PMC10731577)
Supplement: BLOOD_BLD-2023-020426-mmc1.pdf [file BLOOD_BLD-2023-020426-mmc1.pdf]

## **Supplemental Methods**

### ***In vitro B cell Differentiation Assay***

In brief, 10,000 CD34+ cells isolated from bone marrow aspirates of healthy donors were co-cultured in a 12-well tissue culture plate with sub-confluent human MSC in DMEM 10% FBS, 1% penicillin-streptomycin media supplemented with 20 ng/ml stem cell factor (SCF) and 10 ng/ml Flt-3. The effect of IFN- $\gamma$  and TNF in isolation or in combination was evaluated by the addition of IFN- $\gamma$  (5 ng/ml), TNF (5 ng/ml), and the combination of IFN- $\gamma$  (5 ng/ml) and TNF (5 ng/ml) to the differentiation media. Half of the medium was replaced with fresh medium containing the cytokines every 4 days.

### ***RNA Sequencing Analysis***

The sequenced raw FastQ files were aligned with reference genome Hg38 using HISAT2 package. In total, ~12,676 protein-coding genes were considered with at least above 10 read counts in 50% of samples. Differential expression (DE) analysis between treated and non-treated groups were performed using Deseq2 package in R platform. The DE genes were identified with fold change (FC)  $\geq 1.2$  and false discovery rate of (FDR)  $< 0.05$ . The Pheatmap was used to generate the heat maps for DE genes. The principal component analysis (PCA) was performed in prcomp function and the PCA plots were generated using factoextra package in R. The functional relationship between differentially expressed genes were performed by performing a gene ontology (GO) functional annotation using the clusterprofiler package in R. Over Representation Analysis (ORA) was performed to determine whether known biological functions or processes are enriched in our differentially expressed genes list. Gene Set Enrichment Analysis (GSEA) using KEGG and WikiPathways implicated by differentially expressed genes to identify the pathways that are enriched by DE genes. ClusterProfiler package in R was used for both analyses. Significant pathways were identified with a nominal p-value threshold of  $P < 0.05$  and after multiple tests corrections (FDR  $< 0.05$ ).

### ***Multiplex Immunofluorescence Staining***

Deparaffinization was accomplished with heat and EZ-Prep solution, followed by application of Cell Conditioning 1 (Roche). Blocking of endogenous peroxidase activity was performed with DISCOVERY Inhibitor (Roche). After primary antibody incubation, species appropriate horseradish peroxidase (HRP)-conjugated secondary antibody

(DISCOVERY OmniMap anti-rabbit HRP (Roche 760–4311) was applied followed by application of the tyramide signal amplification Opal dye. Denaturing of the primary and secondary antibodies was accomplished by heating at 93°C with Cell Conditioning 2 (Roche). Counter staining of nuclei was achieved using Spectral DAPI (Akoya). Slides were cover-slipped with VECTASHIELD Antifade mounting medium (Vector Laboratories). Stained slides were stored at 4°C. Images of stained slides were acquired with the Vectra Polaris (Akoya Biosciences) whole-slide scanner using a standardized scanning protocol. Software fluorophore signal unmixing and removal of autofluorescence followed by digital image analysis was accomplished with inForm software (Akoya Biosciences).

### ***Cytokine Profiling***

Cytokine profiling was performed using a custom multiplex panel on the Luminex platform looking at IFN- $\gamma$ , IL-6, CXCL9, and CXCL13 in healthy control (n=16) and HLH (P-HLH, n=3; I-HLH, n=6; Total, n=9) patients.

### ***Statistical Analysis***

Shapiro-Wilk test was used for testing the normality of numerical variables. When comparing two groups, two-tailed Student's t-tests or Mann-Whitney test was used depending upon normality. When comparing more than two groups, one-way ANOVA with Tukey's multiple comparison tests or Kruskal-Wallis test with Dunn's multiple comparison was performed for normally distributed or non-normally distributed data, respectively. All analyses were completed at the 0.05 significance level using GraphPad Prism (v9).

## Supplemental Data

| Patient ID | Gender | Age at Presentation | Type of HLH | Mutation | Secondary Cause | Flow Panel A | Flow Panel B |
|------------|--------|---------------------|-------------|----------|-----------------|--------------|--------------|
| 1          | Male   | 8 weeks old         | Primary     | RAB27A   | -               | X            |              |
| 2          | Male   | 6 months old        | Primary     | RAB27A   | -               | X            |              |
| 3          | Male   | 4 weeks old         | Primary     | STXBP2   | -               | X            | X            |
| 4          | Female | 11 years old        | Primary     | PRF1     | -               | X            |              |
| 5          | Male   | 2 months old        | Primary     | UNC13D   | -               | X            | X            |
| 6          | Male   | 3 days old          | Primary     | UNC13D   | -               | X*           | X            |
| 7          | Female | 7 months old        | Secondary   | -        | Infection       | X            |              |
| 8          | Male   | 8 months old        | Secondary   | -        | Infection       | X            |              |
| 9          | Male   | 11 years old        | Secondary   | -        | Infection       | X            |              |
| 10         | Male   | 15 months old       | Secondary   | -        | Infection       | X*           | X*           |
| 11         | Female | 9 years old         | Secondary   | -        | Infection       | X            |              |
| 12         | Female | 4 years old         | Secondary   | -        | Infection       | X            |              |
| 13         | Male   | 15 years old        | Secondary   | -        | Infection       | X            |              |
| 14         | Male   | 11 weeks old        | Secondary   | -        | Infection       | X            |              |
| 15         | Male   | 13 years old        | Secondary   | -        | Infection       | X            |              |
| 16         | Male   | 3 years old         | Secondary   | -        | Infection       | X            |              |
| 17         | Female | 18 years old        | Secondary   | -        | Infection       | X            |              |
| 18         | Male   | 9 years old         | Secondary   | -        | Infection       | X            |              |
| 19         | Female | 12 years old        | Secondary   | -        | Infection       | X            | X*           |
| 20         | Male   | 4 months old        | Secondary   | -        | Infection       | X            |              |
| 21         | Male   | 4 years old         | Secondary   | -        | Infection       | X            |              |
| 22         | Female | 7 years old         | Secondary   | -        | Infection       | X            | X            |
| 23         | Female | 1 year old          | Secondary   | -        | Infection       | X            |              |
| 24         | Female | 2 years old         | Secondary   | -        | Infection       | X            |              |
| 25         | Male   | 2 years old         | Secondary   | -        | Infection       | X*           |              |
| 26         | Female | 7 years old         | Secondary   | -        | Infection       | X            | X            |
| 27         | Male   | 4 years old         | Secondary   | -        | Infection       | X            |              |
| 28         | Male   | 3 years old         | Secondary   | -        | Infection       | X            |              |
| 29         | Male   | 6 years old         | Secondary   | -        | Rheumatologic   | X            |              |
| 30         | Male   | 17 years old        | Secondary   | -        | Rheumatologic   | X            |              |
| 31         | Female | 12 years old        | Secondary   | -        | Rheumatologic   | X            |              |
| 32         | Male   | 3 years old         | Secondary   | -        | Rheumatologic   | X            |              |
| 33         | Male   | 7 years old         | Secondary   | -        | Rheumatologic   | X            |              |
| 34         | Female | 2 years old         | Secondary   | -        | Rheumatologic   | X            |              |
| 35         | Female | 19 years old        | Secondary   | -        | Rheumatologic   | X*           | X*           |
| 36         | Female | 17 years old        | Secondary   | -        | Rheumatologic   | X            | X            |
| 37         | Female | 15 years old        | Secondary   | -        | Rheumatologic   | X            |              |
| 38         | Male   | 12 years old        | Secondary   | -        | Rheumatologic   | X            |              |
| 39         | Female | 14 years old        | Secondary   | -        | Rheumatologic   | X            |              |
| 40         | Female | 15 years old        | Secondary   | -        | Rheumatologic   | X            |              |
| 41         | Female | 3 years old         | Secondary   | -        | Rheumatologic   | X            | X            |
| 42         | Male   | 9 years old         | Secondary   | -        | Rheumatologic   | X*           | X*           |

\*Unable to include patient data in all analysis for Flow Panels due to missing data

**Supplemental Table 1.** Characteristics of patients (n=42) by HLH group and flow data analysis.

**Supplemental Data**

| <b>Patient ID</b> | <b>Gender</b> | <b>Age at Presentation (years)</b> | <b>Type of HLH</b>   | <b>Mutation</b> | <b>Infection</b> | <b>Therapy Received</b>                                  | <b>Duration of Therapy (days)</b> |
|-------------------|---------------|------------------------------------|----------------------|-----------------|------------------|----------------------------------------------------------|-----------------------------------|
| 1                 | F             | 0                                  | Primary              | STXBP2          | -                | Dexamethasone, IVIG, Emapalumab                          | 35                                |
| 2                 | M             | 0.25                               | Primary              | RAB27A          | -                | Dexamethasone, IVIG, Etoposide                           | 15                                |
| 3                 | F             | 19                                 | Infection-Associated | -               | EBV              | Dexamethasone, IVIG                                      | 26                                |
| 4                 | M             | 2                                  | Primary              | Unknown         | -                | Dexamethasone, IVIG, Etoposide, Cyclosporine, Emapalumab | 47                                |
| 5                 | M             | 5                                  | Primary              | IRF3            | -                | Cyclosporine, Solumedrol                                 | 9                                 |
| 6                 | M             | 14                                 | Primary              | PRF1            | -                | Dexamethasone, Etoposide                                 | 107                               |

**Supplemental Table 2.** Characteristics of patients (n=6) with longitudinal data from peripheral blood.

**Supplemental Data**

| <b>Target</b> | <b>Clone</b> | <b>Fluorochrome</b> | <b>Catalog</b> | <b>Vendor</b> |
|---------------|--------------|---------------------|----------------|---------------|
| CD34          | 8G12         | APC                 | 340667         | BD            |
| CD38          | HIT2         | PerCP-Cy5.5         | 656050         | BD            |
| CD45          | 2D1          | APC-H7              | 641408         | BD            |
| CD19          | J3-119       | PC7                 | IM3628U        | BC            |
| CD3           | SK7          | PE-Cy7              | 341101         | BD            |
| CD33          | P67.6        | APC                 | 340680         | BD            |
| CD56          | B159         | APC                 | 555518         | BD            |
| CD16          | 3G8          | V450                | 644490         | BD            |
| CD10          | HI10a        | PE                  | 555375         | BD            |
| CD20          | L27          | FITC                | 340673         | BD            |
| CD3           | UCHT1        | PerCP/Cy5.5         | 300430         | BL            |
| CD4           | RPA-T4       | PE-Cy7              | 560649         | BD            |
| CD38          | HIT2         | BUV496              | 612947         | BD            |
| CD45RA        | HI100        | APC                 | 304112         | BL            |
| CCR7          | G043H7       | PE                  | 353204         | BL            |
| HLA-DR        | G46-6        | BV711               | 563696         | BD            |
| CXCR5         | J252D4       | BV605               | 356930         | BL            |
| CD19          | SJ25C1       | BUV496              | 612938         | BD            |
| CD27          | O323         | APC-Cy7             | 302816         | BL            |
| IgD           | IA6-2        | BV421               | 348226         | BL            |
| Live/Dead     | -            | Aqua                | L3224          | Invitrogen    |
| CD10          | HI10a        | BV421               | 562902         | BD            |
| CD20          | 2H7          | FITC                | 555622         | BD            |
| CD19          | HIB19        | APC                 | 302212         | BL            |
| CD34          | 561          | PE                  | 343606         | BL            |
| CD45          | HI30         | PerCP               | 304026         | BL            |

BD = Biosciences; BC = Beckman Coulter; BL = BioLegend

**Supplemental Table 3.** Surface antibodies (all anti-human) used in flow cytometry.

## Supplemental Data

Supplemental Table 4. RNA seq data list of upregulated differentially expressed genes.

| baseMean    | log2FoldChange | lfcSE       | stat        | pvalue    | padj      | gene_name | fc          |
|-------------|----------------|-------------|-------------|-----------|-----------|-----------|-------------|
| 3692.747872 | 5.514260911    | 0.173480136 | 31.78612287 | 1.01E-221 | 1.28E-217 | GBP1      | 45.70439223 |
| 11317.80009 | 2.838026242    | 0.101118352 | 28.06638161 | 2.52E-173 | 1.60E-169 | WARS      | 7.150411363 |
| 5357.01885  | 2.814471517    | 0.104667791 | 26.88956645 | 2.91E-159 | 1.23E-155 | TAP1      | 7.034615238 |
| 3348.910506 | 3.845930622    | 0.173759597 | 22.13362998 | 1.50E-108 | 4.75E-105 | GBP5      | 14.37939052 |
| 2884.58582  | 2.374785736    | 0.119223692 | 19.91874019 | 2.80E-88  | 7.09E-85  | APOL6     | 5.186587868 |
| 445.371354  | 2.832983423    | 0.154859854 | 18.29385309 | 9.26E-75  | 1.96E-71  | HAPLN3    | 7.12546133  |
| 550.5557188 | 2.405241839    | 0.134460573 | 17.88808256 | 1.46E-71  | 2.64E-68  | LRRK2     | 5.297243543 |
| 2756.095839 | 2.66183963     | 0.154362551 | 17.24407649 | 1.24E-66  | 1.96E-63  | IRF1      | 6.328394906 |
| 14188.80649 | 3.230983909    | 0.194365668 | 16.62322338 | 4.73E-62  | 6.66E-59  | STAT1     | 9.389080703 |
| 44341.43623 | 1.556816694    | 0.094190415 | 16.52839821 | 2.29E-61  | 2.90E-58  | HLA-B     | 2.942039658 |
| 980.9558149 | 2.531664521    | 0.154190564 | 16.41906258 | 1.40E-60  | 1.61E-57  | APOL3     | 5.782384406 |
| 463.0639283 | 7.245048038    | 0.448460548 | 16.15537435 | 1.04E-58  | 1.10E-55  | IFI27     | 151.6969258 |
| 2150.455188 | 2.444885325    | 0.152195172 | 16.06414505 | 4.55E-58  | 4.43E-55  | PSMB9     | 5.444823656 |
| 1811.379561 | 2.980199666    | 0.186048187 | 16.01842899 | 9.50E-58  | 8.60E-55  | MYOF      | 7.890953654 |
| 933.1988875 | 2.412799836    | 0.151768647 | 15.89788066 | 6.55E-57  | 5.53E-54  | APOL1     | 5.325067585 |
| 534.7046033 | 2.810222234    | 0.185250624 | 15.16983949 | 5.60E-52  | 4.43E-49  | ANKRD22   | 7.013926116 |
| 2865.794256 | 2.820774225    | 0.194791685 | 14.48097861 | 1.60E-47  | 1.19E-44  | GBP4      | 7.06541462  |
| 37877.7846  | 1.282512905    | 0.089615747 | 14.31124487 | 1.86E-46  | 1.31E-43  | HLA-A     | 2.432623256 |
| 1835.25003  | 3.678709939    | 0.258312303 | 14.24132686 | 5.08E-46  | 3.38E-43  | LGALS3BP  | 12.80566207 |
| 157.9925909 | 4.641953147    | 0.326863704 | 14.20149464 | 8.97E-46  | 5.68E-43  | CHAC1     | 24.96704452 |
| 518.91725   | 3.484006336    | 0.248696068 | 14.00909296 | 1.37E-44  | 8.27E-42  | RARRES3   | 11.1889778  |
| 582.9559231 | 1.867924459    | 0.138426792 | 13.49395175 | 1.70E-41  | 9.77E-39  | SLAMF8    | 3.650070827 |
| 189.1815389 | 3.153493997    | 0.237677782 | 13.26793766 | 3.55E-40  | 1.96E-37  | TGM2      | 8.898079552 |
| 712.3574612 | 1.480026096    | 0.113276832 | 13.06556753 | 5.18E-39  | 2.73E-36  | IFI35     | 2.789537791 |
| 2920.414051 | 1.890587575    | 0.153176378 | 12.34255307 | 5.34E-35  | 2.71E-32  | UBE2L6    | 3.707862064 |
| 567.0626192 | 1.519342811    | 0.12355434  | 12.29696031 | 9.40E-35  | 4.58E-32  | BTN3A3    | 2.866604379 |
| 620.796809  | 2.892474898    | 0.236676772 | 12.22120309 | 2.40E-34  | 1.12E-31  | HBD       | 7.425431673 |
| 365.4390598 | 2.854219951    | 0.235595482 | 12.11491803 | 8.81E-34  | 3.98E-31  | SDC3      | 7.231124175 |
| 1236.810076 | 1.330785196    | 0.110526226 | 12.04044727 | 2.18E-33  | 9.51E-31  | JAK2      | 2.515395397 |
| 2308.181304 | 1.269057161    | 0.106560009 | 11.90931916 | 1.06E-32  | 4.47E-30  | TNFAIP2   | 2.410040116 |
| 720.1578858 | 2.099009003    | 0.179952333 | 11.66425001 | 1.94E-31  | 7.93E-29  | MT2A      | 4.284150028 |
| 2285.450547 | 2.589511263    | 0.222293197 | 11.6490801  | 2.32E-31  | 9.18E-29  | GBP2      | 6.018947625 |
| 5051.899455 | 1.827950668    | 0.157460076 | 11.60897869 | 3.71E-31  | 1.42E-28  | LAP3      | 3.550323947 |
| 2859.691227 | 1.482800558    | 0.129067843 | 11.48853595 | 1.51E-30  | 5.61E-28  | TAP2      | 2.794907542 |
| 486.079819  | 2.757327882    | 0.248444177 | 11.09837999 | 1.28E-28  | 4.62E-26  | GCH1      | 6.761427573 |
| 296.340015  | 2.265152459    | 0.206720426 | 10.95756478 | 6.11E-28  | 2.15E-25  | ANK1      | 4.807052165 |
| 332.7678585 | 2.93337013     | 0.272435946 | 10.76719196 | 4.92E-27  | 1.64E-24  | IDO1      | 7.638927664 |
| 2084.941549 | 1.122402628    | 0.104625626 | 10.72779844 | 7.54E-27  | 2.45E-24  | PSTPIP2   | 2.177092382 |
| 5106.231461 | 1.719241767    | 0.160557772 | 10.70793241 | 9.34E-27  | 2.96E-24  | PSME2     | 3.292633115 |
| 1484.831553 | 1.159439657    | 0.108616268 | 10.67464088 | 1.34E-26  | 4.13E-24  | ITGB7     | 2.233706535 |
| 25411.20851 | 1.455956356    | 0.141267134 | 10.30640544 | 6.59E-25  | 1.99E-22  | HLA-C     | 2.743383583 |
| 948.3970072 | 1.314409902    | 0.127861265 | 10.27996945 | 8.68E-25  | 2.56E-22  | TNFRSF14  | 2.487005851 |
| 744.0692434 | 1.292510954    | 0.127506164 | 10.13685077 | 3.79E-24  | 1.09E-21  | BTN3A1    | 2.449540175 |
| 110.2071156 | 3.08446891     | 0.309767848 | 9.957356549 | 2.34E-23  | 6.59E-21  | GRIN3A    | 8.48237879  |
| 7448.281904 | 1.067204029    | 0.107909228 | 9.889831046 | 4.61E-23  | 1.27E-20  | CYBB      | 2.095368565 |
| 4042.338916 | 1.21689068     | 0.127104363 | 9.573948948 | 1.03E-21  | 2.77E-19  | PSMB8     | 2.324452073 |
| 1051.841391 | 2.262042868    | 0.238048217 | 9.502456691 | 2.05E-21  | 5.41E-19  | SLAMF7    | 4.79670218  |
| 790.7440442 | 1.946369579    | 0.205943665 | 9.450980581 | 3.36E-21  | 8.68E-19  | VAMP5     | 3.854034749 |
| 107.3006964 | 4.748765557    | 0.503718976 | 9.427410491 | 4.20E-21  | 1.06E-18  | BATF2     | 26.88567069 |

|             |             |             |             |          |          |          |             |
|-------------|-------------|-------------|-------------|----------|----------|----------|-------------|
| 2755.161001 | 1.593074623 | 0.169181404 | 9.416369572 | 4.67E-21 | 1.16E-18 | PARP14   | 3.016916198 |
| 618.8611026 | 1.99542365  | 0.212484072 | 9.390932832 | 5.95E-21 | 1.45E-18 | SES2     | 3.987331767 |
| 2296.932162 | 0.808608705 | 0.086894736 | 9.305612131 | 1.33E-20 | 3.18E-18 | SQOR     | 1.751521509 |
| 103.3969935 | 3.178881322 | 0.344495935 | 9.227630867 | 2.77E-20 | 6.49E-18 | CD274    | 9.056046225 |
| 155.9494578 | 3.093662339 | 0.338376249 | 9.142669875 | 6.09E-20 | 1.40E-17 | FAM178B  | 8.536604487 |
| 6531.930355 | 1.540669427 | 0.171584599 | 8.979065923 | 2.73E-19 | 6.18E-17 | TYMP     | 2.909294668 |
| 668.3356029 | 1.173813741 | 0.131340288 | 8.937194801 | 3.99E-19 | 8.87E-17 | TAGAP    | 2.256072986 |
| 1437.733755 | 1.009055043 | 0.113915894 | 8.857895111 | 8.15E-19 | 1.78E-16 | CASP1    | 2.012592432 |
| 1220.952336 | 2.800461825 | 0.317648752 | 8.816221724 | 1.18E-18 | 2.54E-16 | HLA-F    | 6.966634255 |
| 2915.778033 | 1.139877521 | 0.129335415 | 8.81334414  | 1.21E-18 | 2.56E-16 | PSMB10   | 2.203623145 |
| 237.0972027 | 2.385859649 | 0.274302703 | 8.697907898 | 3.38E-18 | 7.02E-16 | IL12RB1  | 5.226552533 |
| 62041.19913 | 1.268568862 | 0.145878717 | 8.696051656 | 3.44E-18 | 7.02E-16 | B2M      | 2.409224545 |
| 2088.860454 | 1.926062174 | 0.222206509 | 8.667892673 | 4.40E-18 | 8.85E-16 | C1QC     | 3.8001653   |
| 5594.29707  | 0.990562328 | 0.115045038 | 8.610213417 | 7.29E-18 | 1.44E-15 | PSME1    | 1.986959309 |
| 339.0379774 | 2.032404071 | 0.236472506 | 8.594673884 | 8.35E-18 | 1.63E-15 | SPTA1    | 4.090859732 |
| 311.6630929 | 1.346892672 | 0.157761291 | 8.537535818 | 1.37E-17 | 2.63E-15 | IL15RA   | 2.543636774 |
| 1176.970827 | 1.337742354 | 0.156988117 | 8.521296883 | 1.58E-17 | 2.95E-15 | IFITM1   | 2.527554769 |
| 1600.864044 | 2.380127156 | 0.279333074 | 8.520749514 | 1.59E-17 | 2.95E-15 | PSAT1    | 5.205826234 |
| 497.2110821 | 1.552440214 | 0.182355661 | 8.513254838 | 1.69E-17 | 3.10E-15 | KCNH2    | 2.933128372 |
| 234.8295999 | 2.964435406 | 0.349083038 | 8.492063734 | 2.03E-17 | 3.67E-15 | HBA1     | 7.805198949 |
| 206.3623691 | 2.386031897 | 0.281512806 | 8.475749033 | 2.34E-17 | 4.17E-15 | CD209    | 5.227176584 |
| 114.5903813 | 3.174324426 | 0.379154494 | 8.372113421 | 5.66E-17 | 9.96E-15 | AHSP     | 9.02748693  |
| 169.6939307 | 2.369279932 | 0.285243216 | 8.306174511 | 9.88E-17 | 1.69E-14 | ADD2     | 5.166831845 |
| 809.8366699 | 1.097218724 | 0.133731227 | 8.204656044 | 2.31E-16 | 3.91E-14 | PRKAR2B  | 2.139418504 |
| 1638.411969 | 1.069597403 | 0.130407965 | 8.201933077 | 2.37E-16 | 3.94E-14 | CALCOCO2 | 2.098847583 |
| 2680.024069 | 0.768640801 | 0.093981392 | 8.178648785 | 2.87E-16 | 4.72E-14 | ITGAL    | 1.703663962 |
| 1540.676146 | 1.077309559 | 0.132301872 | 8.142814197 | 3.86E-16 | 6.27E-14 | TNFSF10  | 2.11009735  |
| 2021.03524  | 1.155343119 | 0.141956947 | 8.138686742 | 4.00E-16 | 6.41E-14 | PARP9    | 2.227372914 |
| 1980.504069 | 0.911988355 | 0.112200492 | 8.128202819 | 4.36E-16 | 6.90E-14 | NMI      | 1.881637027 |
| 88.46143294 | 2.602772663 | 0.320403961 | 8.123409756 | 4.53E-16 | 7.09E-14 | CCND1    | 6.074529471 |
| 11603.39667 | 1.289517217 | 0.160373366 | 8.040719294 | 8.93E-16 | 1.38E-13 | HLA-E    | 2.444462405 |
| 476.6326537 | 1.335670389 | 0.166860407 | 8.004717323 | 1.20E-15 | 1.83E-13 | FBXO6    | 2.52392736  |
| 1936.895313 | 2.335337589 | 0.292745194 | 7.97737294  | 1.49E-15 | 2.25E-13 | C1QB     | 5.046690415 |
| 282.3023973 | 3.045967865 | 0.383020379 | 7.952495572 | 1.83E-15 | 2.72E-13 | CA1      | 8.259004321 |
| 217.9723351 | 2.247513056 | 0.282780451 | 7.947908175 | 1.90E-15 | 2.79E-13 | NEXN     | 4.748635616 |
| 90.32199247 | 3.33901747  | 0.422364952 | 7.905526852 | 2.67E-15 | 3.88E-13 | SLC6A9   | 10.11915887 |
| 3210.827827 | 1.209106312 | 0.153045425 | 7.900310054 | 2.78E-15 | 4.00E-13 | BST2     | 2.311943774 |
| 656.3776874 | 1.043159352 | 0.132600291 | 7.866946184 | 3.63E-15 | 5.17E-13 | IGSF6    | 2.060735512 |
| 129.2401977 | 2.329264996 | 0.296446162 | 7.857295175 | 3.93E-15 | 5.52E-13 | KREMEN1  | 5.02549253  |
| 781.7104394 | 1.41846985  | 0.181749112 | 7.804548987 | 5.97E-15 | 8.31E-13 | APOL2    | 2.673018551 |
| 1696.868633 | 2.19230437  | 0.287049521 | 7.637373388 | 2.22E-14 | 3.05E-12 | SAMD9L   | 4.570349105 |
| 215.2840235 | 2.551125714 | 0.334764278 | 7.620662892 | 2.52E-14 | 3.44E-12 | CD40     | 5.860914185 |
| 1234.175764 | 1.010969843 | 0.13345624  | 7.575290914 | 3.58E-14 | 4.79E-12 | NUB1     | 2.015265395 |
| 2021.118279 | 1.19953342  | 0.158357573 | 7.574840918 | 3.60E-14 | 4.79E-12 | LY6E     | 2.296653832 |
| 1500.141825 | 1.429831465 | 0.190772723 | 7.494947098 | 6.63E-14 | 8.75E-12 | NLRC5    | 2.694152405 |
| 81.34145683 | 2.925000568 | 0.390554468 | 7.489353749 | 6.92E-14 | 9.04E-12 | HBA2     | 7.594739957 |
| 4267.408012 | 1.279330013 | 0.172359142 | 7.422466807 | 1.15E-13 | 1.49E-11 | MTHFD2   | 2.427262287 |
| 490.2736229 | 1.0987303   | 0.14871717  | 7.388052783 | 1.49E-13 | 1.91E-11 | PARP12   | 2.141661242 |
| 125.1442199 | 2.834519065 | 0.384214517 | 7.377438752 | 1.61E-13 | 2.02E-11 | PKLR     | 7.133049896 |
| 946.1609321 | 1.192643062 | 0.161843687 | 7.369104625 | 1.72E-13 | 2.13E-11 | ALDH1A1  | 2.285711092 |
| 13246.3887  | 0.543669456 | 0.073785991 | 7.368193464 | 1.73E-13 | 2.13E-11 | IFI30    | 1.457675365 |

|             |             |             |             |          |          |          |             |
|-------------|-------------|-------------|-------------|----------|----------|----------|-------------|
| 668.1363644 | 1.849207663 | 0.252069208 | 7.336110891 | 2.20E-13 | 2.68E-11 | ASNS     | 3.603022505 |
| 1114.992969 | 1.046628249 | 0.143136176 | 7.312115496 | 2.63E-13 | 3.17E-11 | CARS     | 2.065696422 |
| 1341.190662 | 2.303248976 | 0.315960108 | 7.289682841 | 3.11E-13 | 3.71E-11 | C1QA     | 4.935680391 |
| 116.9401053 | 2.330342236 | 0.320380637 | 7.273667516 | 3.50E-13 | 4.14E-11 | SOCS1    | 5.029246393 |
| 1693.323529 | 1.817123375 | 0.249985054 | 7.268928069 | 3.62E-13 | 4.25E-11 | SERPING1 | 3.523778827 |
| 640.7433359 | 1.714566977 | 0.236083329 | 7.26254999  | 3.80E-13 | 4.41E-11 | DDX60    | 3.281981204 |
| 614.5755496 | 1.026543142 | 0.141383185 | 7.260715894 | 3.85E-13 | 4.43E-11 | LILRB1   | 2.037137191 |
| 1454.516601 | 2.107063531 | 0.291358684 | 7.231854241 | 4.76E-13 | 5.44E-11 | XAF1     | 4.308135215 |
| 134.3509586 | 1.707458848 | 0.236763394 | 7.211667405 | 5.53E-13 | 6.25E-11 | CDH1     | 3.265850721 |
| 3991.581952 | 0.928030613 | 0.131215917 | 7.072546025 | 1.52E-12 | 1.69E-10 | SLC1A5   | 1.902676926 |
| 1844.200824 | 0.688737647 | 0.09816868  | 7.015859327 | 2.29E-12 | 2.47E-10 | AGPAT3   | 1.611872519 |
| 327.0803216 | 1.546650726 | 0.222011632 | 6.966530131 | 3.25E-12 | 3.49E-10 | GALM     | 2.921381409 |
| 438.0213608 | 1.404075924 | 0.201986898 | 6.951321778 | 3.62E-12 | 3.82E-10 | PMAIP1   | 2.646482152 |
| 2503.687848 | 0.97782932  | 0.141290431 | 6.920704467 | 4.49E-12 | 4.70E-10 | SLC3A2   | 1.969499867 |
| 478.6437968 | 1.484090183 | 0.216285074 | 6.861731876 | 6.80E-12 | 7.01E-10 | STX11    | 2.797407027 |
| 182.2631388 | 1.826075591 | 0.267089929 | 6.836931655 | 8.09E-12 | 8.26E-10 | GIMAP5   | 3.545712572 |
| 525.3041342 | 1.050255835 | 0.153961046 | 6.821568568 | 9.01E-12 | 9.12E-10 | RHOBTB3  | 2.070897051 |
| 411.3743198 | 2.194252996 | 0.322065256 | 6.813069577 | 9.55E-12 | 9.60E-10 | ALDH1L2  | 4.576526377 |
| 725.1887929 | 2.159783363 | 0.319042492 | 6.76957903  | 1.29E-11 | 1.29E-09 | CALHM6   | 4.468477509 |
| 56.64762243 | 2.292540298 | 0.338968141 | 6.763291356 | 1.35E-11 | 1.33E-09 | KEL      | 4.89918     |
| 1085.826121 | 0.848649942 | 0.125844948 | 6.74361549  | 1.54E-11 | 1.52E-09 | SCPEP1   | 1.800814954 |
| 1821.25472  | 0.855131308 | 0.127057473 | 6.730271667 | 1.69E-11 | 1.65E-09 | CD38     | 1.808923388 |
| 1262.575508 | 0.637410177 | 0.095343847 | 6.685383461 | 2.30E-11 | 2.23E-09 | RBCK1    | 1.555534268 |
| 77.37478516 | 2.839915122 | 0.425601051 | 6.672716417 | 2.51E-11 | 2.41E-09 | ASS1     | 7.159779325 |
| 4369.944939 | 1.364470157 | 0.206246346 | 6.615730074 | 3.70E-11 | 3.52E-09 | FGL2     | 2.57481746  |
| 366.4186507 | 1.77932865  | 0.270479557 | 6.578421943 | 4.75E-11 | 4.49E-09 | GBP3     | 3.432664003 |
| 1882.351076 | 0.607302604 | 0.092664957 | 6.553746101 | 5.61E-11 | 5.26E-09 | PAK1     | 1.52340824  |
| 1221.031305 | 0.890582459 | 0.136990292 | 6.501062577 | 7.98E-11 | 7.37E-09 | MOV10    | 1.853924458 |
| 549.7921011 | 0.820606892 | 0.12679837  | 6.471746364 | 9.69E-11 | 8.89E-09 | CASP7    | 1.766148795 |
| 3581.031215 | 0.834228001 | 0.129782936 | 6.427871229 | 1.29E-10 | 1.18E-08 | AARS     | 1.782902736 |
| 2068.452773 | 1.015903811 | 0.159587774 | 6.365799734 | 1.94E-10 | 1.76E-08 | DTX3L    | 2.022169333 |
| 302.9848172 | 1.400071313 | 0.219999515 | 6.36397454  | 1.97E-10 | 1.77E-08 | KLF1     | 2.639146272 |
| 4241.672068 | 0.97413758  | 0.153596116 | 6.342201927 | 2.27E-10 | 2.02E-08 | SLC7A5   | 1.96446652  |
| 79.8746359  | 2.143818271 | 0.339984731 | 6.305631043 | 2.87E-10 | 2.54E-08 | SAMD4A   | 4.419301227 |
| 910.0596112 | 0.731834456 | 0.117775971 | 6.213784092 | 5.17E-10 | 4.52E-08 | DNPEP    | 1.660749473 |
| 4473.579208 | 0.533033136 | 0.086378988 | 6.170865735 | 6.79E-10 | 5.89E-08 | ATP6V1B2 | 1.446968119 |
| 716.8603745 | 1.967611394 | 0.319424674 | 6.159860387 | 7.28E-10 | 6.27E-08 | CCL2     | 3.911200226 |
| 1250.259279 | 0.89786778  | 0.146020067 | 6.148934165 | 7.80E-10 | 6.68E-08 | XRN1     | 1.863310082 |
| 372.9944665 | 1.050996513 | 0.171014667 | 6.145651309 | 7.96E-10 | 6.77E-08 | TMEM268  | 2.07196052  |
| 325.759042  | 1.063836397 | 0.173942474 | 6.116024307 | 9.59E-10 | 8.10E-08 | ARAP2    | 2.090483125 |
| 1433.255426 | 0.60874416  | 0.099567091 | 6.113909253 | 9.72E-10 | 8.15E-08 | LRRC8D   | 1.524931205 |
| 987.9039917 | 1.643766078 | 0.269916774 | 6.089899695 | 1.13E-09 | 9.41E-08 | SECTM1   | 3.124804817 |
| 45.30014517 | 2.557291791 | 0.422304771 | 6.055559788 | 1.40E-09 | 1.15E-07 | TMEM56   | 5.886017333 |
| 315.1663809 | 0.947015506 | 0.156401335 | 6.055034679 | 1.40E-09 | 1.15E-07 | VPS9D1   | 1.927880336 |
| 1449.825568 | 1.075848297 | 0.179508403 | 5.993303268 | 2.06E-09 | 1.68E-07 | IGF2R    | 2.107961177 |
| 1867.186504 | 0.795724494 | 0.132802928 | 5.991769191 | 2.08E-09 | 1.69E-07 | MVP      | 1.735948916 |
| 539.2356008 | 3.610861964 | 0.60744087  | 5.944384287 | 2.77E-09 | 2.24E-07 | APOL4    | 12.21737098 |
| 1361.073316 | 1.378755144 | 0.235314776 | 5.859194936 | 4.65E-09 | 3.71E-07 | PCK2     | 2.600438907 |
| 295.294276  | 1.07229264  | 0.183839433 | 5.832767332 | 5.45E-09 | 4.32E-07 | SLC4A5   | 2.102772307 |
| 866.4133694 | 1.017085512 | 0.17617703  | 5.773088077 | 7.78E-09 | 6.05E-07 | PARP10   | 2.023826355 |
| 1420.15473  | 0.66868646  | 0.116020152 | 5.763537183 | 8.24E-09 | 6.36E-07 | LY75     | 1.589624992 |



|             |             |             |             |          |          |          |             |
|-------------|-------------|-------------|-------------|----------|----------|----------|-------------|
| 163.1104339 | 1.700440398 | 0.295542249 | 5.753628816 | 8.73E-09 | 6.71E-07 | RTP4     | 3.250001532 |
| 1067.02734  | 2.823571516 | 0.49110476  | 5.749428115 | 8.95E-09 | 6.83E-07 | EPST11   | 7.079127286 |
| 7682.268249 | 0.736234575 | 0.128408897 | 5.733516863 | 9.84E-09 | 7.46E-07 | ATF4     | 1.665822374 |
| 630.2726571 | 0.803514657 | 0.14047073  | 5.720157183 | 1.06E-08 | 7.98E-07 | TIFA     | 1.745347924 |
| 1369.815261 | 0.63695634  | 0.111382046 | 5.718662572 | 1.07E-08 | 8.00E-07 | LRRC8C   | 1.555045011 |
| 1164.518355 | 0.66104284  | 0.116446202 | 5.676808957 | 1.37E-08 | 1.02E-06 | ANKRD44  | 1.581225187 |
| 129.4863649 | 1.911579333 | 0.33722924  | 5.668486322 | 1.44E-08 | 1.06E-06 | ATF3     | 3.76220727  |
| 100.0897824 | 2.873530481 | 0.510858554 | 5.624904303 | 1.86E-08 | 1.35E-06 | ADM2     | 7.32856372  |
| 294.1972632 | 1.236501202 | 0.219909378 | 5.622776131 | 1.88E-08 | 1.36E-06 | ST3GAL5  | 2.35626402  |
| 1487.111657 | 0.559197734 | 0.10004875  | 5.589252607 | 2.28E-08 | 1.62E-06 | EFR3A    | 1.473449621 |
| 139.9273025 | 1.357946548 | 0.242980973 | 5.588695003 | 2.29E-08 | 1.62E-06 | KCNMB1   | 2.56320088  |
| 2509.903544 | 0.877761064 | 0.157785206 | 5.563012447 | 2.65E-08 | 1.87E-06 | TRIM22   | 1.837521416 |
| 53.05345407 | 2.275193077 | 0.410433474 | 5.543390644 | 2.97E-08 | 2.08E-06 | MT1E     | 4.840624138 |
| 1250.176389 | 0.582931392 | 0.106563634 | 5.470265713 | 4.49E-08 | 3.13E-06 | RNF41    | 1.4978897   |
| 185.9882589 | 1.175220337 | 0.215315865 | 5.45812236  | 4.81E-08 | 3.33E-06 | MDK      | 2.258273681 |
| 87.74398228 | 2.366037872 | 0.435010609 | 5.439034874 | 5.36E-08 | 3.67E-06 | LAG3     | 5.15523385  |
| 33.88549763 | 2.694299743 | 0.500765483 | 5.380362329 | 7.43E-08 | 5.06E-06 | SSPN     | 6.472395389 |
| 1442.254769 | 0.773747546 | 0.144361444 | 5.359793625 | 8.33E-08 | 5.60E-06 | CIITA    | 1.709705152 |
| 229.4925543 | 2.212675769 | 0.412863251 | 5.359342985 | 8.35E-08 | 5.60E-06 | C2       | 4.635341945 |
| 856.804219  | 1.211208535 | 0.226725857 | 5.342172045 | 9.18E-08 | 6.12E-06 | IRF9     | 2.315315079 |
| 106.2791777 | 1.201717008 | 0.225184722 | 5.33658321  | 9.47E-08 | 6.28E-06 | AIFM2    | 2.30013256  |
| 4315.495698 | 1.241905581 | 0.233710859 | 5.313854846 | 1.07E-07 | 7.08E-06 | RNF213   | 2.365107209 |
| 814.8747725 | 1.124388704 | 0.212791178 | 5.284000562 | 1.26E-07 | 8.29E-06 | FCGR1B   | 2.180091525 |
| 39.18805247 | 3.041076529 | 0.576308765 | 5.276818114 | 1.31E-07 | 8.58E-06 | SELENBP1 | 8.231050277 |
| 1341.763637 | 0.714472122 | 0.135515566 | 5.272251318 | 1.35E-07 | 8.71E-06 | CYLD     | 1.640882713 |
| 29.47916584 | 2.736626067 | 0.520608294 | 5.256593288 | 1.47E-07 | 9.44E-06 | SIGLEC11 | 6.665097901 |
| 698.1080457 | 1.64402395  | 0.313386396 | 5.245996535 | 1.55E-07 | 9.89E-06 | P2RX7    | 3.125363403 |
| 288.2585723 | 0.91931468  | 0.175525432 | 5.237501296 | 1.63E-07 | 1.03E-05 | SLC7A7   | 1.8912167   |
| 251.4877849 | 1.022280732 | 0.195291361 | 5.234643899 | 1.65E-07 | 1.04E-05 | CAMK2D   | 2.031127397 |
| 2656.883455 | 0.631287697 | 0.121361733 | 5.201703063 | 1.97E-07 | 1.24E-05 | ERAP1    | 1.54894691  |
| 1484.394695 | 3.015271909 | 0.580578228 | 5.193566972 | 2.06E-07 | 1.29E-05 | NCF1     | 8.08513526  |
| 97.67416903 | 1.371229347 | 0.264986284 | 5.174718195 | 2.28E-07 | 1.42E-05 | C5orf56  | 2.586909075 |
| 236.1224053 | 1.244498439 | 0.241700088 | 5.148936634 | 2.62E-07 | 1.61E-05 | GATA1    | 2.369361677 |
| 131.399158  | 1.759246642 | 0.342064651 | 5.143023805 | 2.70E-07 | 1.65E-05 | ISG20    | 3.385213071 |
| 149.9020728 | 1.086144913 | 0.211832795 | 5.127369037 | 2.94E-07 | 1.77E-05 | CXCR2    | 2.123059661 |
| 101.0230418 | 1.637654335 | 0.319492679 | 5.125796116 | 2.96E-07 | 1.77E-05 | TNF      | 3.111595088 |
| 796.2015692 | 0.710924448 | 0.13892404  | 5.117360866 | 3.10E-07 | 1.84E-05 | TRIM21   | 1.636852641 |
| 732.8056511 | 0.59311361  | 0.115912102 | 5.11692568  | 3.11E-07 | 1.84E-05 | VRK2     | 1.508498864 |
| 365.1823583 | 0.918898636 | 0.179726541 | 5.112759803 | 3.17E-07 | 1.87E-05 | APOBEC3G | 1.89067139  |
| 65.98619263 | 1.715280392 | 0.337491999 | 5.082432757 | 3.73E-07 | 2.17E-05 | CYSLTR2  | 3.283604552 |
| 629.2870056 | 1.444605917 | 0.284464941 | 5.07832675  | 3.81E-07 | 2.20E-05 | ICAM1    | 2.721884628 |
| 2765.089898 | 0.645739424 | 0.127555771 | 5.06240852  | 4.14E-07 | 2.37E-05 | TGFB1    | 1.564540954 |
| 94.20837997 | 1.793312726 | 0.354819015 | 5.054161841 | 4.32E-07 | 2.47E-05 | SPTB     | 3.466098674 |
| 350.216898  | 0.763267462 | 0.151399509 | 5.041413059 | 4.62E-07 | 2.62E-05 | KIF21B   | 1.697330443 |
| 129.6182449 | 2.771815286 | 0.552624463 | 5.015730343 | 5.28E-07 | 2.99E-05 | FLT1     | 6.829667229 |
| 270.0395196 | 0.982283063 | 0.196406593 | 5.001273372 | 5.70E-07 | 3.21E-05 | TUBE1    | 1.975589305 |
| 2429.766702 | 0.630205615 | 0.126098405 | 4.997728671 | 5.80E-07 | 3.25E-05 | POMP     | 1.547785571 |
| 3053.638786 | 0.749169495 | 0.149992636 | 4.994708504 | 5.89E-07 | 3.29E-05 | GARS     | 1.680824965 |
| 309.606541  | 1.380449415 | 0.276578851 | 4.99116042  | 6.00E-07 | 3.33E-05 | GIMAP7   | 2.603494601 |
| 85.2595836  | 1.880123568 | 0.377109496 | 4.985617141 | 6.18E-07 | 3.40E-05 | RHAG     | 3.681065876 |
| 786.0329489 | 0.786780655 | 0.158585696 | 4.961233432 | 7.00E-07 | 3.84E-05 | JDP2     | 1.72522037  |

|             |             |             |             |          |             |         |             |
|-------------|-------------|-------------|-------------|----------|-------------|---------|-------------|
| 193.2052586 | 1.117346841 | 0.226835118 | 4.925810659 | 8.40E-07 | 4.55E-05    | KMO     | 2.169476323 |
| 1507.580221 | 0.441097499 | 0.089585948 | 4.923735379 | 8.49E-07 | 4.58E-05    | PATL1   | 1.357636728 |
| 334.0975521 | 0.989267846 | 0.201393907 | 4.912104159 | 9.01E-07 | 4.83E-05    | SCIMP   | 1.985177277 |
| 169.3653363 | 1.123977849 | 0.228932193 | 4.909653976 | 9.12E-07 | 4.84E-05    | IGF2BP3 | 2.179470761 |
| 833.4989185 | 0.521724674 | 0.106270688 | 4.909393975 | 9.14E-07 | 4.84E-05    | RBM47   | 1.435670499 |
| 28.95245973 | 2.537414484 | 0.517073616 | 4.907259637 | 9.24E-07 | 4.87E-05    | EPB42   | 5.805476497 |
| 455.4359314 | 1.483886849 | 0.303196519 | 4.894142098 | 9.87E-07 | 5.19E-05    | OPTN    | 2.797012786 |
| 159.7246095 | 1.409329593 | 0.288074682 | 4.892236921 | 9.97E-07 | 5.22E-05    | TCN2    | 2.656137059 |
| 1004.075417 | 3.01965911  | 0.620339693 | 4.867750919 | 1.13E-06 | 5.88E-05    | KLHDC7B | 8.109759384 |
| 301.3793204 | 0.845219155 | 0.174278038 | 4.849831711 | 1.24E-06 | 6.41E-05    | FAM43A  | 1.796537631 |
| 2550.170655 | 0.765574442 | 0.157948469 | 4.846988673 | 1.25E-06 | 6.48E-05    | PHGDH   | 1.700046776 |
| 583.0516947 | 0.896169296 | 0.184963216 | 4.845121722 | 1.27E-06 | 6.51E-05    | SLC8A1  | 1.861117699 |
| 377.7043557 | 1.291473886 | 0.266795634 | 4.840685989 | 1.29E-06 | 6.61E-05    | APOC1   | 2.447779979 |
| 1986.415068 | 0.536403146 | 0.111225799 | 4.82265041  | 1.42E-06 | 7.18E-05    | LCP2    | 1.450352062 |
| 1636.65389  | 0.505043746 | 0.104912041 | 4.813973151 | 1.48E-06 | 7.47E-05    | SARS    | 1.419166388 |
| 2114.196706 | 0.512123088 | 0.107284031 | 4.773525778 | 1.81E-06 | 9.06E-05    | ADGRE5  | 1.426147389 |
| 1718.415488 | 0.770832795 | 0.161605177 | 4.769852104 | 1.84E-06 | 9.16E-05    | PLEKHO1 | 1.706254434 |
| 2122.751622 | 2.594477308 | 0.543942365 | 4.769765098 | 1.84E-06 | 9.16E-05    | HBB     | 6.039701749 |
| 1319.964057 | 0.755751266 | 0.158677782 | 4.762804586 | 1.91E-06 | 9.45E-05    | GPT2    | 1.688510634 |
| 661.5624984 | 0.785553329 | 0.16564196  | 4.742477856 | 2.11E-06 | 0.000103645 | GIMAP2  | 1.723753319 |
| 354.8747925 | 1.621471503 | 0.345430968 | 4.69405367  | 2.68E-06 | 0.000128504 | FCGR3A  | 3.07688709  |
| 199.752797  | 1.049879793 | 0.225579661 | 4.654142091 | 3.25E-06 | 0.000152897 | CAPRIN2 | 2.070357336 |
| 427.5807794 | 0.891155783 | 0.191491371 | 4.653764692 | 3.26E-06 | 0.000152897 | ETV5    | 1.85466135  |
| 1608.827553 | 0.596311047 | 0.128203912 | 4.651270299 | 3.30E-06 | 0.000154187 | UBA7    | 1.511845849 |
| 2075.786107 | 0.561690998 | 0.120907318 | 4.645632754 | 3.39E-06 | 0.000157876 | DOCK10  | 1.475998237 |
| 1110.856559 | 0.538969458 | 0.11661305  | 4.621862302 | 3.80E-06 | 0.000175164 | AIDA    | 1.452934291 |
| 7791.932155 | 0.546247323 | 0.118262905 | 4.618923591 | 3.86E-06 | 0.000177019 | CTSZ    | 1.460282327 |
| 3681.007196 | 0.575698134 | 0.124975408 | 4.606491344 | 4.10E-06 | 0.000185913 | TAPBP   | 1.490398507 |
| 4752.605702 | 1.044774556 | 0.227268902 | 4.597085414 | 4.28E-06 | 0.000193809 | IFITM3  | 2.063043949 |
| 120.3670472 | 1.361979054 | 0.296921959 | 4.58699336  | 4.50E-06 | 0.00020269  | CFH     | 2.570375357 |
| 104.4404173 | 1.335069254 | 0.291320465 | 4.582819993 | 4.59E-06 | 0.000206046 | GPR84   | 2.52287592  |
| 351.5746547 | 1.01486937  | 0.221543303 | 4.580907469 | 4.63E-06 | 0.000206531 | SCO2    | 2.020719917 |
| 1288.945939 | 0.538764773 | 0.117612397 | 4.580850213 | 4.63E-06 | 0.000206531 | LPGAT1  | 1.452728168 |
| 431.5865069 | 0.695978347 | 0.152080258 | 4.57638852  | 4.73E-06 | 0.000210243 | RHBDD1  | 1.619982633 |
| 4715.543716 | 0.575870199 | 0.125977489 | 4.5712151   | 4.85E-06 | 0.00021414  | PSMA4   | 1.490576271 |
| 1625.446489 | 0.662697967 | 0.145028636 | 4.569428387 | 4.89E-06 | 0.000215083 | CASP4   | 1.583040282 |
| 551.3427848 | 1.040284301 | 0.228041155 | 4.561827012 | 5.07E-06 | 0.000221482 | CMPK2   | 2.056632898 |
| 493.7529139 | 0.557805479 | 0.122575475 | 4.550710328 | 5.35E-06 | 0.000232711 | AP1AR   | 1.472028372 |
| 2519.986831 | 0.724014937 | 0.159144587 | 4.549416043 | 5.38E-06 | 0.000233345 | CLIC4   | 1.651772432 |
| 2132.810947 | 0.511584888 | 0.112902813 | 4.531197002 | 5.87E-06 | 0.000253538 | NCF2    | 1.42561546  |
| 980.2565966 | 0.611631969 | 0.135584294 | 4.511082739 | 6.45E-06 | 0.000275059 | TRAFD1  | 1.527986682 |
| 205.6901983 | 0.85113442  | 0.189424402 | 4.493267028 | 7.01E-06 | 0.000298113 | RILP    | 1.803918825 |
| 701.5437025 | 0.727625618 | 0.162173026 | 4.486724048 | 7.23E-06 | 0.000305363 | SP110   | 1.655911555 |
| 413.0592358 | 1.334277573 | 0.298123437 | 4.475587646 | 7.62E-06 | 0.000320654 | ODF3B   | 2.521491869 |
| 2624.483726 | 0.60060588  | 0.134230292 | 4.474443668 | 7.66E-06 | 0.000321308 | NFE2L1  | 1.516353247 |
| 37.07547993 | 2.0643248   | 0.461670713 | 4.471422473 | 7.77E-06 | 0.000324806 | ALAS2   | 4.182381892 |
| 1757.260135 | 0.415867632 | 0.093086436 | 4.467542756 | 7.91E-06 | 0.000329663 | RAD23A  | 1.334100759 |
| 24.82989577 | 2.284079418 | 0.512704904 | 4.454959178 | 8.39E-06 | 0.000348457 | SLC2A14 | 4.870532181 |
| 94.70508246 | 1.763573096 | 0.395944912 | 4.454087024 | 8.43E-06 | 0.000348733 | XK      | 3.39538012  |
| 858.3878088 | 0.509677467 | 0.114535239 | 4.449962054 | 8.59E-06 | 0.00035434  | LHFPL2  | 1.423731867 |
| 1612.275934 | 0.47687864  | 0.107294854 | 4.444562078 | 8.81E-06 | 0.000362178 | SCARB2  | 1.391729314 |

|             |             |             |             |          |             |          |             |
|-------------|-------------|-------------|-------------|----------|-------------|----------|-------------|
| 198.65888   | 0.986244085 | 0.222329966 | 4.435947623 | 9.17E-06 | 0.00037575  | EPOR     | 1.981020878 |
| 258.3320804 | 0.759388913 | 0.171710152 | 4.422504459 | 9.76E-06 | 0.000397343 | MYH10    | 1.692773459 |
| 1085.537307 | 0.448542414 | 0.101452169 | 4.421220536 | 9.81E-06 | 0.000397718 | CEP55    | 1.364660813 |
| 339.8718801 | 1.117841814 | 0.25285299  | 4.420915933 | 9.83E-06 | 0.000397718 | FAM92A   | 2.170220774 |
| 1066.701102 | 0.564842655 | 0.127866004 | 4.417457622 | 9.99E-06 | 0.000402846 | PCGF5    | 1.479226172 |
| 2431.304871 | 0.367092998 | 0.083308041 | 4.406453383 | 1.05E-05 | 0.000422509 | FAM111A  | 1.289751387 |
| 312.9589719 | 0.717022608 | 0.162920265 | 4.401064585 | 1.08E-05 | 0.000431771 | DNAJA4   | 1.643786134 |
| 2425.324313 | 0.87084982  | 0.198098027 | 4.396054997 | 1.10E-05 | 0.000440457 | STAT2    | 1.828739803 |
| 563.5962489 | 1.188006481 | 0.270656004 | 4.389359427 | 1.14E-05 | 0.00045281  | SLC7A11  | 2.27837699  |
| 1398.249161 | 0.521827614 | 0.119134248 | 4.380164598 | 1.19E-05 | 0.000470864 | HAX1     | 1.435772942 |
| 915.3134358 | 0.792311138 | 0.181634039 | 4.362129157 | 1.29E-05 | 0.000509818 | CCDC50   | 1.731846588 |
| 609.2319453 | 0.580708745 | 0.133173423 | 4.360545325 | 1.30E-05 | 0.000511922 | DDHD1    | 1.495583796 |
| 224.2151485 | 0.888691794 | 0.204184884 | 4.352387787 | 1.35E-05 | 0.000529702 | IGFBP4   | 1.851496464 |
| 291.1791163 | 0.668315577 | 0.153597368 | 4.351087419 | 1.35E-05 | 0.000531204 | B3GALNT1 | 1.589216389 |
| 125.2584531 | 1.519970834 | 0.349386406 | 4.350400613 | 1.36E-05 | 0.000531225 | AKR1C1   | 2.867852518 |
| 397.0262382 | 0.685069715 | 0.157664654 | 4.345106513 | 1.39E-05 | 0.000542526 | USP6NL   | 1.607779672 |
| 3873.195513 | 0.387778719 | 0.089335871 | 4.340683258 | 1.42E-05 | 0.000551866 | EPRS     | 1.308377377 |
| 66.93281073 | 1.307846167 | 0.301445135 | 4.338587735 | 1.43E-05 | 0.00055545  | SIGLEC16 | 2.475716584 |
| 612.807663  | 1.149037422 | 0.26512558  | 4.333936473 | 1.46E-05 | 0.000565593 | TRIB3    | 2.217658811 |
| 3903.896517 | 0.408509751 | 0.094369694 | 4.328823511 | 1.50E-05 | 0.000577123 | DOCK8    | 1.327314041 |
| 1185.260188 | 0.42677974  | 0.099270995 | 4.299138339 | 1.71E-05 | 0.000655596 | USP25    | 1.344229751 |
| 2465.410392 | 0.821801008 | 0.191176684 | 4.298646618 | 1.72E-05 | 0.000655596 | FCGR1A   | 1.767611237 |
| 528.6342715 | 0.527664033 | 0.122823518 | 4.296115595 | 1.74E-05 | 0.000661131 | MFSD6    | 1.441593122 |
| 317.8954651 | 1.039418723 | 0.243054547 | 4.276483354 | 1.90E-05 | 0.000720023 | IL18BP   | 2.055399345 |
| 803.9927338 | 0.47726202  | 0.111697746 | 4.272799023 | 1.93E-05 | 0.000729843 | APOBEC3C | 1.3920992   |
| 1088.143781 | 0.452219258 | 0.10598997  | 4.266623143 | 1.98E-05 | 0.000748101 | DECR1    | 1.368143216 |
| 570.9267879 | 0.607849491 | 0.142541478 | 4.264369214 | 2.00E-05 | 0.000753449 | HTATIP2  | 1.523985832 |
| 41.53112148 | 1.512918146 | 0.35542188  | 4.256682641 | 2.07E-05 | 0.000777507 | BATF3    | 2.853867088 |
| 888.7017809 | 0.423238543 | 0.099462819 | 4.255243775 | 2.09E-05 | 0.000780216 | SETD7    | 1.34093429  |
| 950.4964936 | 0.453254613 | 0.106558222 | 4.253586493 | 2.10E-05 | 0.000783704 | HLA-DOA  | 1.369125421 |
| 57.39855072 | 2.546925095 | 0.59891058  | 4.252596598 | 2.11E-05 | 0.000784869 | HBG2     | 5.843874092 |
| 147.1902479 | 1.621597899 | 0.383824415 | 4.224843012 | 2.39E-05 | 0.000880388 | CSF1     | 3.077156671 |
| 1848.276428 | 0.442296835 | 0.104766979 | 4.221719834 | 2.42E-05 | 0.000890091 | CDT1     | 1.358765822 |
| 80.22743456 | 1.374541274 | 0.325732562 | 4.219846071 | 2.44E-05 | 0.000894927 | TMEM150B | 2.592854542 |
| 111.1214355 | 1.143937733 | 0.271166255 | 4.218584394 | 2.46E-05 | 0.000897355 | L3MBTL4  | 2.209833359 |
| 544.1766481 | 0.756238215 | 0.17947989  | 4.213498319 | 2.51E-05 | 0.000915166 | IFRD1    | 1.68908065  |
| 56.83406223 | 1.809605445 | 0.431042263 | 4.19820885  | 2.69E-05 | 0.000970823 | IL15     | 3.505464064 |
| 1049.783097 | 0.995430448 | 0.237206467 | 4.196472639 | 2.71E-05 | 0.000975513 | SNX10    | 1.993675277 |
| 260.7114415 | 0.890077911 | 0.212215493 | 4.194217385 | 2.74E-05 | 0.000979702 | TFR2     | 1.853276205 |
| 1073.607869 | 0.591350151 | 0.141528298 | 4.178317409 | 2.94E-05 | 0.001044475 | GPCPD1   | 1.506656097 |
| 643.9039062 | 1.283230379 | 0.307204232 | 4.177124678 | 2.95E-05 | 0.001044475 | SIGLEC1  | 2.433833336 |
| 878.8230564 | 0.567609226 | 0.135937697 | 4.175510106 | 2.97E-05 | 0.001048981 | MR1      | 1.482065518 |
| 578.4432303 | 0.775670176 | 0.185960515 | 4.171155226 | 3.03E-05 | 0.001065693 | GIMAP6   | 1.711985136 |
| 1662.027525 | 0.506721333 | 0.121497112 | 4.170645071 | 3.04E-05 | 0.001065693 | OGFR     | 1.420817575 |
| 67.06682617 | 1.210229278 | 0.290613478 | 4.164394874 | 3.12E-05 | 0.001092283 | TUBB2A   | 2.313744046 |
| 418.2427624 | 0.663013021 | 0.159272735 | 4.162752775 | 3.14E-05 | 0.00109714  | HVCN1    | 1.583386022 |
| 38.86082744 | 1.879174536 | 0.453708923 | 4.141806429 | 3.45E-05 | 0.001192477 | GPT      | 3.678645197 |
| 288.5856189 | 0.705385816 | 0.17040787  | 4.13939694  | 3.48E-05 | 0.001201786 | CLIC2    | 1.630580668 |
| 274.7492881 | 1.401623026 | 0.340607601 | 4.115066788 | 3.87E-05 | 0.001332227 | IFIT5    | 2.641986375 |
| 94.97161897 | 1.025106001 | 0.249934459 | 4.101499266 | 4.10E-05 | 0.001401392 | PBK      | 2.035108907 |
| 245.3353936 | 0.870925204 | 0.212559167 | 4.097330708 | 4.18E-05 | 0.001415414 | GFI1B    | 1.828835361 |

|             |             |             |             |             |             |          |             |
|-------------|-------------|-------------|-------------|-------------|-------------|----------|-------------|
| 82.41676258 | 1.148078258 | 0.280362819 | 4.094973294 | 4.22E-05    | 0.001422288 | ABCB4    | 2.216184908 |
| 440.7375548 | 0.696182756 | 0.17026896  | 4.088723837 | 4.34E-05    | 0.001457272 | ARHGEF3  | 1.620212177 |
| 68.68166556 | 1.361612316 | 0.335446514 | 4.059104089 | 4.93E-05    | 0.001637649 | ARHGEF5  | 2.569722041 |
| 2399.098128 | 0.557800924 | 0.137458983 | 4.057944505 | 4.95E-05    | 0.001641491 | SLC7A1   | 1.472023725 |
| 5838.024544 | 0.543077991 | 0.134081303 | 4.050363311 | 5.11E-05    | 0.00168238  | PRDX1    | 1.457077881 |
| 24.27482376 | 2.397524349 | 0.592460675 | 4.046723183 | 5.19E-05    | 0.001704319 | CEACAM1  | 5.268982356 |
| 2035.616904 | 0.390497036 | 0.09668324  | 4.038932022 | 5.37E-05    | 0.001757371 | WDFY1    | 1.310844937 |
| 533.654157  | 0.798505172 | 0.197780163 | 4.037337019 | 5.41E-05    | 0.001764797 | TRIB2    | 1.739298043 |
| 317.4960481 | 0.687534447 | 0.170625128 | 4.029502888 | 5.59E-05    | 0.001819962 | FAM117B  | 1.610528786 |
| 168.2788651 | 1.038253316 | 0.261274437 | 3.973803663 | 7.07E-05    | 0.002291343 | ASPHD2   | 2.053739667 |
| 1264.958903 | 0.806916645 | 0.203312081 | 3.968857343 | 7.22E-05    | 0.00232161  | DAPP1    | 1.749468447 |
| 123.4143395 | 0.860248253 | 0.216953695 | 3.965123775 | 7.34E-05    | 0.002352281 | SNTB2    | 1.815350661 |
| 867.4218287 | 0.3929305   | 0.099723151 | 3.940213452 | 8.14E-05    | 0.002584247 | ZCCHC8   | 1.313057869 |
| 727.4466014 | 0.660445254 | 0.169267691 | 3.901779771 | 9.55E-05    | 0.002994537 | LIMK1    | 1.580570354 |
| 229.7926802 | 0.633315338 | 0.162317322 | 3.901711358 | 9.55E-05    | 0.002994537 | APOBEC3F | 1.551125414 |
| 2250.355602 | 0.511127885 | 0.131204617 | 3.895654727 | 9.79E-05    | 0.003062789 | EIF4EBP1 | 1.42516394  |
| 2832.061239 | 0.546026003 | 0.140285389 | 3.892251396 | 9.93E-05    | 0.003098436 | CUL1     | 1.460058326 |
| 157.3512951 | 0.754656339 | 0.194259095 | 3.884792818 | 0.000102417 | 0.003179451 | TTBK2    | 1.687229633 |
| 62.49960299 | 1.926512404 | 0.49679407  | 3.877889291 | 0.000105367 | 0.003263017 | TNXB     | 3.801351422 |
| 875.3300286 | 1.015689579 | 0.262421133 | 3.8704565   | 0.000108632 | 0.003344344 | IL1RN    | 2.021869074 |
| 583.9053402 | 0.976432327 | 0.252333715 | 3.869607074 | 0.000109011 | 0.003344344 | IFIH1    | 1.967593681 |
| 273.548317  | 0.889946534 | 0.229988751 | 3.869522004 | 0.000109049 | 0.003344344 | PTK2     | 1.853107447 |
| 4452.216178 | 0.421485187 | 0.1090094   | 3.866503154 | 0.000110407 | 0.003369676 | SHMT2    | 1.339305598 |
| 3565.656737 | 0.458129013 | 0.119039181 | 3.848556505 | 0.000118816 | 0.003617601 | LYN      | 1.373759076 |
| 1432.569269 | 1.84703589  | 0.481672032 | 3.834633874 | 0.000125751 | 0.003819588 | IFI6     | 3.597602745 |
| 921.4568335 | 0.463004518 | 0.120985444 | 3.826944001 | 0.000129744 | 0.00393143  | NDC80    | 1.37840947  |
| 142.0219931 | 1.526635588 | 0.399101329 | 3.825182921 | 0.000130675 | 0.003950191 | CLCN4    | 2.881131658 |
| 114.847774  | 1.030710479 | 0.26972868  | 3.821286182 | 0.000132757 | 0.004003587 | GDPD5    | 2.043030127 |
| 94.95444236 | 1.860074774 | 0.488817874 | 3.805251144 | 0.00014166  | 0.004241774 | ADAMTS14 | 3.63026477  |
| 3764.806609 | 0.414545967 | 0.10918034  | 3.796892062 | 0.000146522 | 0.004376986 | EIF2S2   | 1.332879138 |
| 626.4126904 | 0.514239287 | 0.136187877 | 3.775954943 | 0.000159396 | 0.00472812  | TRAK2    | 1.42824085  |
| 1756.658261 | 0.492895363 | 0.130626569 | 3.773316302 | 0.000161092 | 0.004767265 | PML      | 1.407266304 |
| 18.70002316 | 2.277223499 | 0.604200202 | 3.768988315 | 0.000163911 | 0.004839373 | PLEK2    | 4.847441539 |
| 580.6465782 | 0.545632479 | 0.145145611 | 3.759207575 | 0.000170452 | 0.005020813 | HEG1     | 1.459660121 |
| 339.4982711 | 1.256170722 | 0.336805183 | 3.729665645 | 0.000191734 | 0.005569961 | SMPDL3A  | 2.388609015 |
| 82.48254187 | 1.033762134 | 0.277736282 | 3.722099703 | 0.000197573 | 0.005713377 | GPR18    | 2.047356212 |
| 54.36869401 | 1.189429909 | 0.319945906 | 3.717596906 | 0.000201127 | 0.005802899 | KLF5     | 2.280626048 |
| 61.02292504 | 1.675866568 | 0.451011427 | 3.715796243 | 0.000202565 | 0.005817881 | ASB2     | 3.195112142 |
| 361.4321517 | 0.831975973 | 0.224081044 | 3.712835136 | 0.00020495  | 0.005873081 | CTSO     | 1.78012182  |
| 757.1419035 | 0.556085392 | 0.149837771 | 3.711249769 | 0.000206238 | 0.005896651 | TRIM56   | 1.470274358 |
| 31.22021432 | 2.036497191 | 0.550140878 | 3.701773983 | 0.000214097 | 0.006093835 | NEO1     | 4.102482533 |
| 1025.087808 | 0.533608264 | 0.144371308 | 3.696082484 | 0.000218952 | 0.006218037 | DESI1    | 1.447545066 |
| 438.4412512 | 0.502905255 | 0.136449123 | 3.685661309 | 0.00022811  | 0.006463614 | SLC9A7   | 1.417064331 |
| 1162.710101 | 0.438811697 | 0.119294544 | 3.678388643 | 0.000234712 | 0.006635857 | CCZ1B    | 1.355487395 |
| 226.8868091 | 1.043867621 | 0.284121211 | 3.67402214  | 0.000238762 | 0.006735323 | ASCL2    | 2.061747447 |
| 670.0407978 | 0.642956118 | 0.175596415 | 3.661556054 | 0.000250688 | 0.007040386 | FGD2     | 1.561525488 |
| 485.0148363 | 1.040661393 | 0.286017466 | 3.638454    | 0.00027428  | 0.007652039 | TAPBPL   | 2.057170532 |
| 301.8778094 | 0.774638994 | 0.213364065 | 3.630597284 | 0.000282766 | 0.007871462 | TNKS1BP1 | 1.710761914 |
| 39.23895897 | 1.554239251 | 0.428301996 | 3.628839614 | 0.000284698 | 0.007907863 | RHEBL1   | 2.936788257 |
| 1456.977557 | 0.434337095 | 0.119876158 | 3.623215003 | 0.000290964 | 0.008031251 | CMIP     | 1.351289785 |
| 197.4803828 | 1.073694614 | 0.296342548 | 3.623153748 | 0.000291033 | 0.008031251 | CD276    | 2.10481672  |

|             |             |             |             |             |             |          |             |
|-------------|-------------|-------------|-------------|-------------|-------------|----------|-------------|
| 241.9451309 | 0.745099347 | 0.205715554 | 3.621988378 | 0.000292347 | 0.008049718 | PDE4B    | 1.676089685 |
| 266.278496  | 1.272836577 | 0.351993427 | 3.616080528 | 0.000299097 | 0.008199929 | BCL2A1   | 2.416361955 |
| 387.8716227 | 2.283776197 | 0.633533662 | 3.604822182 | 0.000312367 | 0.008526804 | GIMAP4   | 4.869508616 |
| 816.1559228 | 0.483937923 | 0.134330896 | 3.602580909 | 0.000315073 | 0.00858219  | PRIM1    | 1.398555903 |
| 1139.034381 | 1.147409667 | 0.319227368 | 3.594333638 | 0.000325223 | 0.00876441  | BTN3A2   | 2.215158096 |
| 233.8137313 | 0.659902056 | 0.183723472 | 3.591822251 | 0.000328374 | 0.008830536 | BTN2A2   | 1.579975357 |
| 161.9713721 | 0.704523651 | 0.196299941 | 3.589016106 | 0.000331928 | 0.008907213 | AKAP7    | 1.629606512 |
| 1758.865395 | 0.58601353  | 0.163421335 | 3.585905894 | 0.00033591  | 0.008975673 | ITPR1    | 1.501093175 |
| 329.8052628 | 0.517868144 | 0.144439397 | 3.58536628  | 0.000336605 | 0.008975673 | AMMECR1  | 1.431837871 |
| 608.7642137 | 0.553358661 | 0.154386656 | 3.584238909 | 0.000338063 | 0.008995589 | CASP10   | 1.467498126 |
| 585.8727665 | 0.481888111 | 0.134849791 | 3.573517682 | 0.000352217 | 0.009352592 | RARA     | 1.396570217 |
| 1142.362707 | 0.422804414 | 0.118370038 | 3.571887119 | 0.000354418 | 0.00939134  | SUSD6    | 1.340530844 |
| 39.788183   | 1.327659386 | 0.372896605 | 3.560395478 | 0.000370297 | 0.009771204 | RAB39A   | 2.509951325 |
| 473.5454838 | 0.500476721 | 0.140688329 | 3.557343556 | 0.000374624 | 0.009864841 | ADAMDEC1 | 1.41468095  |
| 82.83966681 | 1.655903442 | 0.467505792 | 3.541995562 | 0.000397112 | 0.010392195 | DUSP5    | 3.15120463  |
| 117.4076646 | 1.503915557 | 0.424679833 | 3.541292616 | 0.000398172 | 0.010398439 | TMOD1    | 2.836114065 |
| 454.6121556 | 0.460409057 | 0.130247023 | 3.534891217 | 0.000407943 | 0.010631701 | TPD52    | 1.37593189  |
| 1215.422377 | 0.515738853 | 0.146388791 | 3.523076106 | 0.000426569 | 0.011077131 | EPG5     | 1.429726163 |
| 441.02109   | 0.544659684 | 0.154810161 | 3.518242483 | 0.000434415 | 0.011252154 | PYCR1    | 1.458676218 |
| 1062.94409  | 0.583666402 | 0.166022995 | 3.515575675 | 0.000438802 | 0.011342576 | ZNFX1    | 1.498653025 |
| 43.82371578 | 2.592200245 | 0.738221775 | 3.511411247 | 0.000445734 | 0.01149831  | SLC4A1   | 6.030176563 |
| 489.0595568 | 1.050437801 | 0.300011088 | 3.501329924 | 0.000462942 | 0.011893768 | IFI44    | 2.071158267 |
| 879.8297821 | 0.515094106 | 0.147184139 | 3.499657712 | 0.000465856 | 0.011944395 | SIAH2    | 1.429087355 |
| 33752.65877 | 0.273586213 | 0.078298807 | 3.494130014 | 0.000475609 | 0.012145298 | LCP1     | 1.208808921 |
| 1298.79759  | 0.474260856 | 0.135802741 | 3.492277496 | 0.00047892  | 0.012205244 | LMO4     | 1.389206298 |
| 400.7617634 | 0.520505791 | 0.149068855 | 3.491713886 | 0.000479932 | 0.012206464 | CYB561   | 1.434458063 |
| 485.6257614 | 0.700942723 | 0.201006518 | 3.48716415  | 0.000488172 | 0.012391146 | ABI3     | 1.625566665 |
| 12332.07137 | 0.689882789 | 0.198243771 | 3.479972088 | 0.000501466 | 0.012652527 | HLA-DPA1 | 1.613152453 |
| 535.3044439 | 0.617035292 | 0.177502205 | 3.476211981 | 0.00050855  | 0.012780349 | DYNLT1   | 1.533720178 |
| 31.89996303 | 2.426979183 | 0.69830436  | 3.475532048 | 0.000509841 | 0.01278742  | UBXN10   | 5.377662381 |
| 773.7952443 | 0.394779798 | 0.113674986 | 3.472881878 | 0.000514902 | 0.012888829 | AKIRIN2  | 1.314742073 |
| 129.0891545 | 4.507965907 | 1.300108139 | 3.467377654 | 0.000525563 | 0.013108439 | CXCL10   | 22.75270089 |
| 1118.847988 | 0.476483424 | 0.137422649 | 3.467284518 | 0.000525745 | 0.013108439 | FANCA    | 1.391348112 |
| 456.6381657 | 0.53616661  | 0.154814168 | 3.463291629 | 0.00053361  | 0.01327839  | CDC42BPA | 1.45011429  |
| 768.4483051 | 0.369514448 | 0.10671301  | 3.462693513 | 0.000534797 | 0.013281846 | RIPOR2   | 1.29191795  |
| 69.32967103 | 2.480625686 | 0.716681516 | 3.461266451 | 0.00053764  | 0.013326327 | TNFAIP6  | 5.581394751 |
| 41.71814886 | 1.637861912 | 0.473914818 | 3.456025958 | 0.000548203 | 0.013561588 | EPCAM    | 3.112042823 |
| 482.3573877 | 0.456247507 | 0.132144719 | 3.452635197 | 0.000555139 | 0.013685861 | SFXN3    | 1.371968642 |
| 1074.530863 | 0.396377738 | 0.114808412 | 3.452514777 | 0.000555387 | 0.013685861 | LIMK2    | 1.316199098 |
| 29.22471353 | 3.582002345 | 1.037760303 | 3.451666376 | 0.000557136 | 0.013702304 | INHBA    | 11.97540336 |
| 28.40089654 | 1.779108754 | 0.515534094 | 3.451001155 | 0.000558511 | 0.013709501 | SLC16A9  | 3.432140836 |
| 567.6939497 | 0.572148167 | 0.166006691 | 3.446536783 | 0.000567821 | 0.013911072 | LRRCC1   | 1.486735667 |
| 72.60094997 | 0.987231027 | 0.286491818 | 3.445930969 | 0.000569096 | 0.013915379 | SLC49A3  | 1.98237655  |
| 25.04052145 | 1.959658778 | 0.569958831 | 3.438246186 | 0.000585495 | 0.014261117 | HBG1     | 3.889699699 |
| 61.9847641  | 1.291627286 | 0.375721023 | 3.437729613 | 0.000586613 | 0.014261117 | FN3K     | 2.448040262 |
| 2803.469277 | 0.440046612 | 0.128290461 | 3.430080514 | 0.000603402 | 0.014557508 | PSMA2    | 1.356648159 |
| 3165.866962 | 0.330511878 | 0.096408462 | 3.428245537 | 0.000607496 | 0.014628405 | TARS     | 1.257459451 |
| 215.917756  | 0.687580091 | 0.200659963 | 3.426593335 | 0.000611204 | 0.014689764 | TMCO4    | 1.61057974  |
| 1605.854142 | 0.344341842 | 0.100518142 | 3.425668598 | 0.000613288 | 0.01469985  | SNX6     | 1.269571672 |
| 1020.455296 | 0.403248711 | 0.117723855 | 3.425378054 | 0.000613944 | 0.01469985  | ELK3     | 1.322482573 |
| 1106.110758 | 0.420909642 | 0.123135179 | 3.41827286  | 0.000630199 | 0.015060566 | BBX      | 1.338771405 |

|             |             |             |             |             |             |          |             |
|-------------|-------------|-------------|-------------|-------------|-------------|----------|-------------|
| 1950.021059 | 0.301907545 | 0.088725966 | 3.402696632 | 0.000667243 | 0.015907968 | GLS      | 1.23277332  |
| 205.6658489 | 0.719035256 | 0.211384841 | 3.401545973 | 0.000670059 | 0.015923005 | BANK1    | 1.646080917 |
| 2732.595839 | 0.47615448  | 0.140007983 | 3.400909507 | 0.000671621 | 0.015930236 | WSB1     | 1.391030912 |
| 48.52145298 | 1.165275296 | 0.34435984  | 3.383888482 | 0.00071467  | 0.01687041  | GNGT2    | 2.242760081 |
| 420.982775  | 0.463037291 | 0.13684493  | 3.383664194 | 0.000715254 | 0.01687041  | RIMKLB   | 1.378440783 |
| 2124.017867 | 0.382749284 | 0.113212839 | 3.380793969 | 0.000722767 | 0.017015927 | PRPS2    | 1.303824133 |
| 2323.81962  | 0.333522129 | 0.098713884 | 3.378674977 | 0.000728361 | 0.01711158  | CSNK1A1  | 1.260085938 |
| 339.5495619 | 0.960546779 | 0.284561991 | 3.375527337 | 0.000736744 | 0.017280733 | GIMAP8   | 1.946047304 |
| 53326.0114  | 0.585232191 | 0.173673663 | 3.369723313 | 0.000752437 | 0.017616204 | CD74     | 1.500280429 |
| 394.7688975 | 0.51512789  | 0.153180769 | 3.362875719 | 0.000771351 | 0.017992504 | SP140L   | 1.429120821 |
| 216.4199329 | 0.556625611 | 0.165791901 | 3.357375156 | 0.000786863 | 0.018320593 | AGFG2    | 1.470825007 |
| 334.0593669 | 0.504457365 | 0.150283574 | 3.356703263 | 0.000788777 | 0.018331471 | GALNT6   | 1.418589687 |
| 267.5691634 | 0.618158645 | 0.184327789 | 3.353583576 | 0.000797723 | 0.018486248 | PFKFB2   | 1.534914872 |
| 520.6872309 | 0.488814433 | 0.145769313 | 3.353342494 | 0.000798418 | 0.018486248 | RIPK2    | 1.403291216 |
| 139.490253  | 0.799730107 | 0.238614275 | 3.351560202 | 0.000803576 | 0.018539325 | PIR      | 1.74077544  |
| 1565.283964 | 0.361795709 | 0.108017227 | 3.349426002 | 0.000809792 | 0.018614924 | NBN      | 1.28502436  |
| 2632.604048 | 0.378726157 | 0.113147538 | 3.347188676 | 0.000816356 | 0.018697954 | TFEC     | 1.300193329 |
| 900.6080562 | 0.636639855 | 0.190245515 | 3.346411906 | 0.000818647 | 0.018716573 | DDX60L   | 1.554703917 |
| 160.5579052 | 0.702158474 | 0.209880964 | 3.345508146 | 0.000821319 | 0.018743842 | CNRIP1   | 1.626937098 |
| 498.9125798 | 0.571004894 | 0.171228797 | 3.334748028 | 0.000853767 | 0.019414391 | SFMBT2   | 1.48555796  |
| 159.0311825 | 0.763551096 | 0.229670981 | 3.324543192 | 0.000885635 | 0.020067003 | PLS3     | 1.697664171 |
| 555.9520698 | 0.466105691 | 0.140929077 | 3.30737773  | 0.000941738 | 0.021224297 | RBM38    | 1.381375643 |
| 882.3193079 | 0.34768558  | 0.105584931 | 3.292946983 | 0.000991432 | 0.02214722  | VCPIP1   | 1.272517574 |
| 415.0365924 | 0.533733023 | 0.162148896 | 3.291622926 | 0.000996111 | 0.022212568 | SCARF1   | 1.44767025  |
| 196.1219087 | 0.700505917 | 0.212918055 | 3.290025907 | 0.001001782 | 0.022299764 | MGAT3    | 1.625074565 |
| 2140.524373 | 0.305635199 | 0.093053947 | 3.284494739 | 0.001021654 | 0.02266247  | TRIM44   | 1.235962695 |
| 709.4018169 | 0.496649948 | 0.15124484  | 3.283748051 | 0.001024365 | 0.022682869 | ATXN7    | 1.410933457 |
| 2567.637663 | 0.559251738 | 0.17053558  | 3.279384497 | 0.001040338 | 0.022996369 | HLA-DMA  | 1.473504778 |
| 540.7490456 | 0.647750866 | 0.197574426 | 3.278515744 | 0.001043545 | 0.023027084 | SLC31A2  | 1.566723799 |
| 49.18245069 | 1.8004281   | 0.550134111 | 3.272707625 | 0.001065226 | 0.023423877 | MYL4     | 3.483235702 |
| 394.5075958 | 0.510531292 | 0.156168201 | 3.269111698 | 0.001078857 | 0.023663604 | TSPAN17  | 1.424574718 |
| 1377.528385 | 0.309166616 | 0.094579697 | 3.268847603 | 0.001079864 | 0.023663604 | RNF138   | 1.23899178  |
| 524.6325654 | 0.662445428 | 0.202909029 | 3.264741009 | 0.001095642 | 0.023926556 | ZNF618   | 1.582763201 |
| 31.02378924 | 1.543624103 | 0.472953611 | 3.263795996 | 0.001099303 | 0.023965181 | GRTP1    | 2.915259082 |
| 615.5472599 | 0.517568229 | 0.158610551 | 3.263138713 | 0.001101856 | 0.023979562 | FAM241A  | 1.431540244 |
| 39.12594788 | 1.782587609 | 0.546822008 | 3.259904653 | 0.001114497 | 0.024089105 | ARHGEF35 | 3.440426944 |
| 421.4114244 | 1.08891927  | 0.334092238 | 3.259337235 | 0.001116728 | 0.024096221 | TNFAIP3  | 2.127146312 |
| 1309.607487 | 0.443030721 | 0.136178128 | 3.253317755 | 0.001140659 | 0.024549962 | C5orf15  | 1.35945719  |
| 2801.411965 | 0.305622722 | 0.093995784 | 3.251451366 | 0.001148174 | 0.024590827 | CDC42SE2 | 1.235952006 |
| 468.0176238 | 0.632005556 | 0.194393961 | 3.251158384 | 0.001149358 | 0.024590827 | SIPA1L1  | 1.54971783  |
| 969.6494019 | 0.568120515 | 0.17538639  | 3.239250854 | 0.001198441 | 0.025511691 | PAG1     | 1.482590852 |
| 28.37382906 | 1.450300348 | 0.447883313 | 3.238120969 | 0.001203198 | 0.025569972 | CRTAM    | 2.732649352 |
| 60.27936816 | 1.331334795 | 0.412459354 | 3.227796347 | 0.001247478 | 0.026388957 | CDC42EP1 | 2.516353826 |
| 888.9109622 | 0.329868492 | 0.102211677 | 3.227307316 | 0.001249612 | 0.026388957 | DNAJC15  | 1.256898797 |
| 4025.782113 | 0.474086593 | 0.146903262 | 3.227202623 | 0.001250069 | 0.026388957 | IFI16    | 1.389038506 |
| 2138.014347 | 0.283437941 | 0.087848882 | 3.226426271 | 0.001253465 | 0.026416623 | PRR11    | 1.21709176  |
| 723.7938965 | 0.415910335 | 0.129572214 | 3.209872868 | 0.001327937 | 0.027663896 | RAPGEF2  | 1.334140249 |
| 98.75951444 | 0.995817288 | 0.310525808 | 3.206874479 | 0.001341855 | 0.027907946 | ABCB6    | 1.994209927 |
| 720.4837627 | 0.390576562 | 0.121946852 | 3.20284252  | 0.001360784 | 0.028255224 | FECH     | 1.310917197 |
| 472.1405094 | 0.477695704 | 0.149220447 | 3.201275131 | 0.001368208 | 0.028347548 | MICB     | 1.392517738 |
| 119.4419322 | 1.307163258 | 0.40836603  | 3.200959831 | 0.001369706 | 0.028347548 | RASGEF1B | 2.474544965 |

|             |             |             |             |             |             |          |             |
|-------------|-------------|-------------|-------------|-------------|-------------|----------|-------------|
| 1853.44748  | 0.37308072  | 0.116788586 | 3.194496409 | 0.00140075  | 0.028925762 | RIF1     | 1.29511546  |
| 2267.741076 | 0.308255947 | 0.09650504  | 3.194195328 | 0.001402212 | 0.028925762 | CRYBG1   | 1.238209941 |
| 4108.566536 | 0.336894728 | 0.10564908  | 3.188808897 | 0.001428603 | 0.02942225  | IDH1     | 1.263035096 |
| 237.3944199 | 0.743347742 | 0.23319926  | 3.187607642 | 0.001434551 | 0.029496781 | DHX58    | 1.674055945 |
| 93.12582863 | 1.201528568 | 0.377521426 | 3.182676487 | 0.001459206 | 0.02990663  | CTTN     | 2.299832143 |
| 643.7586441 | 0.450627922 | 0.141773806 | 3.178499144 | 0.001480397 | 0.030268786 | MTF1     | 1.366634945 |
| 998.8656042 | 0.38723168  | 0.121846465 | 3.178029659 | 0.001482796 | 0.030268786 | CLIP1    | 1.307881362 |
| 3865.498504 | 0.47749448  | 0.150459165 | 3.173581893 | 0.001505704 | 0.030611957 | YARS     | 1.392323526 |
| 1207.11637  | 0.797492478 | 0.251552026 | 3.170288431 | 0.001522877 | 0.030879448 | ATF5     | 1.738077579 |
| 75.49309781 | 1.200680678 | 0.378748765 | 3.170124338 | 0.001523737 | 0.030879448 | SPON2    | 2.298480901 |
| 5599.920647 | 0.321085444 | 0.101360972 | 3.167742358 | 0.001536276 | 0.031034245 | PLEK     | 1.249270112 |
| 416.6068441 | 0.473833555 | 0.149719954 | 3.164798969 | 0.001551901 | 0.031254367 | GPR65    | 1.3887949   |
| 460.5434168 | 0.542255208 | 0.171341638 | 3.164760271 | 0.001552108 | 0.031254367 | STN1     | 1.456247131 |
| 4196.219411 | 0.347795937 | 0.109944188 | 3.163386277 | 0.001559453 | 0.031352424 | PIK3AP1  | 1.272614916 |
| 292.0355367 | 0.587992698 | 0.185977322 | 3.161636543 | 0.001568852 | 0.031441591 | FAM72C   | 1.50315387  |
| 279.8636162 | 0.871643636 | 0.275924219 | 3.158996474 | 0.001583134 | 0.031577915 | GSAP     | 1.82974631  |
| 3136.710748 | 0.612198803 | 0.194142954 | 3.153340306 | 0.001614135 | 0.032145654 | CNDP2    | 1.528587145 |
| 709.024022  | 0.699499125 | 0.222111957 | 3.149308732 | 0.001636572 | 0.032492001 | RAB24    | 1.623940895 |
| 2808.587515 | 0.32958843  | 0.10465758  | 3.149207444 | 0.001637139 | 0.032492001 | LONP1    | 1.256654827 |
| 297.9569603 | 0.574851285 | 0.182559938 | 3.148835891 | 0.001639222 | 0.032492001 | P2RY6    | 1.489523913 |
| 264.6336114 | 0.507723926 | 0.161323887 | 3.14723341  | 0.001648233 | 0.032568679 | IL17RC   | 1.421805308 |
| 185.8392704 | 0.675606477 | 0.215183345 | 3.139678286 | 0.001691335 | 0.033316399 | FAM84B   | 1.597268088 |
| 602.6943557 | 0.544724303 | 0.173616089 | 3.13752203  | 0.001703825 | 0.033494436 | LACC1    | 1.458741554 |
| 421.5842382 | 0.521760036 | 0.166313598 | 3.137206119 | 0.001705662 | 0.033494436 | ZBTB38   | 1.435705689 |
| 186.8761685 | 1.200591652 | 0.38281657  | 3.136206073 | 0.001711489 | 0.033551769 | RETREG1  | 2.29833907  |
| 62.29491184 | 1.379730104 | 0.440038192 | 3.135478079 | 0.001715743 | 0.033551769 | MFSD2B   | 2.602196853 |
| 5417.57702  | 0.478483764 | 0.152664822 | 3.134210994 | 0.001723169 | 0.033551769 | ADAR     | 1.393278596 |
| 534.6277882 | 0.370824654 | 0.118323546 | 3.133988674 | 0.001724475 | 0.033551769 | C12orf4  | 1.293091759 |
| 282.9811544 | 0.623682715 | 0.199617087 | 3.12439543  | 0.001781708 | 0.03455914  | FAS      | 1.540803318 |
| 123.3063768 | 0.978959854 | 0.313607283 | 3.121610714 | 0.001798646 | 0.0348125   | FHL2     | 1.971043825 |
| 1934.591176 | 0.643042996 | 0.206253695 | 3.117728374 | 0.001822507 | 0.035188829 | HLA-DMB  | 1.561619525 |
| 15.0071348  | 2.386128266 | 0.767919038 | 3.10726541  | 0.001888268 | 0.036237577 | YBX2     | 5.227525759 |
| 596.0897489 | 0.675477183 | 0.217583032 | 3.104457076 | 0.001906286 | 0.036417823 | RHBF2    | 1.597124947 |
| 237.3007654 | 0.516770321 | 0.16686434  | 3.096948815 | 0.001955236 | 0.037296722 | CDC42BPB | 1.430748725 |
| 559.932688  | 0.785146323 | 0.253878535 | 3.092606165 | 0.001984073 | 0.037555675 | EIF2AK2  | 1.72326709  |
| 20.18727154 | 1.831705703 | 0.59232048  | 3.092423382 | 0.001985295 | 0.037555675 | PDZD7    | 3.559576737 |
| 647.4460848 | 1.975890474 | 0.638986027 | 3.092227981 | 0.001986602 | 0.037555675 | IFIT3    | 3.933709646 |
| 23.47463715 | 1.626557388 | 0.527376052 | 3.08424583  | 0.002040689 | 0.038520665 | PDGFRA   | 3.087753079 |
| 433.5833653 | 0.507515513 | 0.164669331 | 3.082028148 | 0.002055954 | 0.038751061 | CARD16   | 1.421599927 |
| 1167.39441  | 0.378878799 | 0.123124515 | 3.077200326 | 0.002089548 | 0.039325732 | BCL2L13  | 1.300330901 |
| 271.2364983 | 0.603056456 | 0.196174382 | 3.07408363  | 0.002111502 | 0.039504119 | ARHGEF12 | 1.518931128 |
| 2981.285563 | 0.393334469 | 0.127975109 | 3.073523207 | 0.002115472 | 0.039520019 | MARS     | 1.31342559  |
| 941.7255476 | 0.992307536 | 0.324198095 | 3.060806188 | 0.002207419 | 0.040995855 | IRF7     | 1.989364361 |
| 333.7490317 | 0.829758638 | 0.27114532  | 3.060199    | 0.0022119   | 0.041018919 | DDIT3    | 1.777387981 |
| 838.7293018 | 0.332419304 | 0.108876292 | 3.053183555 | 0.002264274 | 0.041867582 | CBWD2    | 1.259123071 |
| 58.81552416 | 1.053124047 | 0.346628477 | 3.038192525 | 0.002380018 | 0.043879642 | RYR3     | 2.075018281 |
| 336.1814087 | 1.210205628 | 0.399442752 | 3.029734852 | 0.002447685 | 0.04473648  | SLFN5    | 2.313706118 |
| 5475.838734 | 0.401470362 | 0.132678091 | 3.025897928 | 0.00247896  | 0.045178615 | SLC38A2  | 1.320853409 |
| 771.0261728 | 0.34767522  | 0.114900082 | 3.025891827 | 0.00247901  | 0.045178615 | CNOT10   | 1.272508436 |
| 628.0694963 | 0.474443118 | 0.156996477 | 3.021998494 | 0.002511118 | 0.045698018 | TRAPPC6B | 1.389381813 |
| 25244.30872 | 0.27496671  | 0.091146859 | 3.016743676 | 0.002555058 | 0.046364413 | FLNA     | 1.209966169 |

|             |             |             |             |             |             |       |             |
|-------------|-------------|-------------|-------------|-------------|-------------|-------|-------------|
| 220.1017357 | 0.564548678 | 0.188459386 | 2.995598629 | 0.002739067 | 0.049420261 | LMTK2 | 1.478924781 |
| 2747.535358 | 0.353806446 | 0.118205003 | 2.99315965  | 0.002761053 | 0.049604956 | BAZ2A | 1.277927903 |
| 476.9167733 | 0.407717327 | 0.136340932 | 2.990424962 | 0.002785896 | 0.049980389 | GCLM  | 1.326585192 |



Supplemental Table 5. RNA seq data list of downregulated differentially expressed genes.

| baseMean    | log2FoldChange | lfcSE       | stat         | pvalue   | padj        | gene_name | fc          |
|-------------|----------------|-------------|--------------|----------|-------------|-----------|-------------|
| 375.4947459 | -2.238655339   | 0.206352878 | -10.84867514 | 2.02E-27 | 6.93E-25    | OLFML2B   | 4.71956973  |
| 4293.085575 | -0.709780895   | 0.085050261 | -8.345428792 | 7.10E-17 | 1.23E-14    | CSF3R     | 1.635555703 |
| 548.8892808 | -0.942431842   | 0.127725292 | -7.378584379 | 1.60E-13 | 2.02E-11    | GALNT14   | 1.921764884 |
| 688.1072483 | -1.02062612    | 0.14191079  | -7.192026201 | 6.38E-13 | 7.16E-11    | LRG1      | 2.028799254 |
| 1251.512652 | -1.063136048   | 0.150534182 | -7.062422843 | 1.64E-12 | 1.80E-10    | HSPA1A    | 2.089468556 |
| 273.381433  | -1.470190869   | 0.209281573 | -7.024941792 | 2.14E-12 | 2.34E-10    | PCOLCE2   | 2.770585461 |
| 615.1075102 | -1.717445256   | 0.24687316  | -6.956792134 | 3.48E-12 | 3.71E-10    | FCER1A    | 3.288535527 |
| 2940.54556  | -0.749704851   | 0.108399089 | -6.916154506 | 4.64E-12 | 4.82E-10    | CD163     | 1.681448802 |
| 407.2367834 | -1.199612144   | 0.183478122 | -6.538175405 | 6.23E-11 | 5.80E-09    | FGFR1     | 2.296779158 |
| 43468.36314 | -1.111679595   | 0.178459746 | -6.229301662 | 4.69E-10 | 4.12E-08    | PRTN3     | 2.160970826 |
| 55.3456768  | -2.072403931   | 0.350680555 | -5.909663081 | 3.43E-09 | 2.75E-07    | CTTNBP2   | 4.205869047 |
| 1177.656483 | -0.685678858   | 0.117587756 | -5.831209652 | 5.50E-09 | 4.33E-07    | ANXA3     | 1.608458661 |
| 862.4765766 | -0.640202076   | 0.110570151 | -5.790008175 | 7.04E-09 | 5.50E-07    | CPNE2     | 1.558547447 |
| 6114.112411 | -0.474691508   | 0.082893337 | -5.726533911 | 1.03E-08 | 7.73E-07    | VAT1      | 1.389621044 |
| 471.0442909 | -0.746929573   | 0.132618629 | -5.63216177  | 1.78E-08 | 1.30E-06    | DHRS13    | 1.678217348 |
| 856.2446212 | -0.728759451   | 0.129944774 | -5.608224381 | 2.04E-08 | 1.47E-06    | HSPA1B    | 1.657213469 |
| 596.8712718 | -0.857817749   | 0.153364366 | -5.593331547 | 2.23E-08 | 1.59E-06    | TCTEX1D1  | 1.812294921 |
| 4400.263188 | -0.611248335   | 0.112283503 | -5.44379469  | 5.22E-08 | 3.59E-06    | SELL      | 1.527580422 |
| 432.3068506 | -0.861882124   | 0.160325558 | -5.375824893 | 7.62E-08 | 5.16E-06    | ENC1      | 1.817407735 |
| 566.6588575 | -1.24583401    | 0.236281445 | -5.272669675 | 1.34E-07 | 8.71E-06    | MMP2      | 2.371556122 |
| 495.2115982 | -0.913526132   | 0.174064406 | -5.248207566 | 1.54E-07 | 9.82E-06    | S100B     | 1.883643744 |
| 52.46906165 | -3.173610265   | 0.614050146 | -5.168324254 | 2.36E-07 | 1.46E-05    | COLEC12   | 9.023019258 |
| 111.2297385 | -1.366155088   | 0.265503707 | -5.145521709 | 2.67E-07 | 1.63E-05    | SLC7A8    | 2.577826359 |
| 4791.159861 | -0.648459363   | 0.126400465 | -5.130197595 | 2.89E-07 | 1.75E-05    | GYPC      | 1.567493394 |
| 3045.460054 | -0.551760743   | 0.107623527 | -5.126766982 | 2.95E-07 | 1.77E-05    | FUT4      | 1.465873636 |
| 173.2082424 | -2.236331992   | 0.438112711 | -5.104467266 | 3.32E-07 | 1.95E-05    | SDC2      | 4.711975349 |
| 573.7066892 | -1.194590536   | 0.23467244  | -5.090459429 | 3.57E-07 | 2.08E-05    | MS4A4A    | 2.288798625 |
| 127.9765859 | -1.260489965   | 0.248558377 | -5.071202913 | 3.95E-07 | 2.28E-05    | CCR6      | 2.395770918 |
| 4757.269762 | -2.514223963   | 0.503891841 | -4.989610388 | 6.05E-07 | 3.35E-05    | F13A1     | 5.712902718 |
| 298.7974507 | -1.420488394   | 0.286974271 | -4.949880657 | 7.43E-07 | 4.05E-05    | S100A12   | 2.676761117 |
| 4763.723046 | -0.634004381   | 0.128351509 | -4.939594275 | 7.83E-07 | 4.26E-05    | ITM2C     | 1.551866421 |
| 1903.963323 | -0.673269697   | 0.137083377 | -4.911388319 | 9.04E-07 | 4.83E-05    | PLPPR3    | 1.594683035 |
| 1898.264238 | -0.790658588   | 0.163280041 | -4.842346823 | 1.28E-06 | 6.58E-05    | P2RY2     | 1.729863962 |
| 4593.243921 | -0.642585374   | 0.132998486 | -4.831523985 | 1.35E-06 | 6.89E-05    | TMED9     | 1.561124258 |
| 4796.670712 | -0.555049741   | 0.115482378 | -4.806358792 | 1.54E-06 | 7.73E-05    | IGFBP7    | 1.469219288 |
| 292.5079024 | -0.889204081   | 0.187097367 | -4.752627447 | 2.01E-06 | 9.90E-05    | SIGLEC6   | 1.852154028 |
| 384.2183198 | -1.221067841   | 0.25784214  | -4.735718688 | 2.18E-06 | 0.000106747 | STON1     | 2.331192015 |
| 1127.826121 | -0.571244385   | 0.120687666 | -4.733245764 | 2.21E-06 | 0.00010764  | B3GNT5    | 1.485804586 |
| 1392.468836 | -0.507016351   | 0.1072807   | -4.726072338 | 2.29E-06 | 0.000111084 | CD34      | 1.421108149 |
| 722.0329202 | -1.174987499   | 0.249108905 | -4.716762338 | 2.40E-06 | 0.000115844 | HPGD      | 2.257909245 |
| 964.2966298 | -1.537625115   | 0.327012113 | -4.702043304 | 2.58E-06 | 0.000124045 | SELENOP   | 2.903162074 |
| 297869.3481 | -0.557950266   | 0.11902815  | -4.687548844 | 2.76E-06 | 0.000132155 | MPO       | 1.472176111 |
| 783.3569363 | -0.72114139    | 0.154160831 | -4.677850937 | 2.90E-06 | 0.000138039 | PROM1     | 1.64848572  |
| 1946.108815 | -0.739088902   | 0.158214541 | -4.671434743 | 2.99E-06 | 0.000141889 | ENTPD7    | 1.669121414 |
| 78839.18564 | -0.62749759    | 0.134463865 | -4.666663333 | 3.06E-06 | 0.000144681 | CALR      | 1.544883009 |
| 1258.323842 | -0.466179804   | 0.100526351 | -4.6373891   | 3.53E-06 | 0.000163701 | HGSNAT    | 1.381446608 |
| 19625.62729 | -1.049137081   | 0.226849413 | -4.624817269 | 3.75E-06 | 0.000173316 | CTSG      | 2.069291772 |
| 52411.43666 | -0.604357769   | 0.130906411 | -4.616716353 | 3.90E-06 | 0.000178266 | ELANE     | 1.520301825 |
| 128.2577043 | -1.260296596   | 0.273382579 | -4.610010642 | 4.03E-06 | 0.000183451 | IGF1      | 2.395449827 |
| 476.1534866 | -0.684086988   | 0.149655513 | -4.571077771 | 4.85E-06 | 0.00021414  | ADGRG3    | 1.606684867 |

|             |              |             |              |             |             |          |             |
|-------------|--------------|-------------|--------------|-------------|-------------|----------|-------------|
| 1747.833976 | -0.912172448 | 0.199956384 | -4.561857099 | 5.07E-06    | 0.000221482 | FCN1     | 1.881877146 |
| 282.8281472 | -0.699714531 | 0.154833392 | -4.519144864 | 6.21E-06    | 0.000267493 | MTSS1L   | 1.62418338  |
| 511.3612372 | -0.590461411 | 0.130702957 | -4.517582663 | 6.25E-06    | 0.00026856  | AFF2     | 1.505728241 |
| 1330.123994 | -0.480346203 | 0.106474033 | -4.511392943 | 6.44E-06    | 0.000275059 | CHPF2    | 1.395078402 |
| 2559.064602 | -0.434685917 | 0.096878194 | -4.486932482 | 7.23E-06    | 0.000305363 | MFSD10   | 1.351616546 |
| 910.429156  | -0.84222223  | 0.189895097 | -4.435197347 | 9.20E-06    | 0.000375845 | HOMER3   | 1.792809539 |
| 164.7703944 | -0.913993202 | 0.211230517 | -4.326994111 | 1.51E-05    | 0.000580172 | AIF1L    | 1.88425367  |
| 18753.69241 | -0.633063415 | 0.148919813 | -4.251035513 | 2.13E-05    | 0.000788049 | HSPA5    | 1.550854581 |
| 235.0413798 | -0.722477038 | 0.170498254 | -4.237445377 | 2.26E-05    | 0.000834839 | UGT3A2   | 1.650012596 |
| 94.15496092 | -1.253527552 | 0.297548394 | -4.212852685 | 2.52E-05    | 0.000915166 | PCSK5    | 2.384236837 |
| 941.8480477 | -0.501836873 | 0.119156336 | -4.211583622 | 2.54E-05    | 0.000917694 | LPCAT1   | 1.416015319 |
| 2481.884392 | -0.394871918 | 0.094119126 | -4.195448193 | 2.72E-05    | 0.000977157 | RAB5B    | 1.314826025 |
| 206.090248  | -0.896806805 | 0.213933967 | -4.191979505 | 2.77E-05    | 0.000986631 | C5AR1    | 1.861940286 |
| 1004.775734 | -0.457746697 | 0.109568103 | -4.177736793 | 2.94E-05    | 0.001044475 | CPA3     | 1.373395076 |
| 731.6287838 | -1.409227693 | 0.338797402 | -4.159499705 | 3.19E-05    | 0.001109825 | CYP1B1   | 2.655949459 |
| 279.2104713 | -0.765773578 | 0.184770325 | -4.144461924 | 3.41E-05    | 0.001181972 | HOMER2   | 1.70028145  |
| 1145.514772 | -1.16513432  | 0.283804444 | -4.105412525 | 4.04E-05    | 0.001385345 | BEX1     | 2.242540935 |
| 2158.28861  | -0.451566556 | 0.110024554 | -4.104234387 | 4.06E-05    | 0.001388659 | TMEM214  | 1.367524383 |
| 3022.077258 | -0.345101712 | 0.084170671 | -4.100023305 | 4.13E-05    | 0.001406568 | APMAP    | 1.270240533 |
| 559.6264326 | -0.651734084 | 0.159045703 | -4.097778636 | 4.17E-05    | 0.001415414 | FKBP11   | 1.571055431 |
| 1493.591166 | -0.38275821  | 0.093461222 | -4.095369219 | 4.21E-05    | 0.001422288 | P3H1     | 1.3038322   |
| 220.4500983 | -1.374392371 | 0.336721002 | -4.081694821 | 4.47E-05    | 0.001498089 | CCDC3    | 2.592586944 |
| 540.2449834 | -0.60663712  | 0.148650778 | -4.080954904 | 4.49E-05    | 0.001498901 | 1-Mar    | 1.522705687 |
| 51.22937449 | -2.084563507 | 0.511292014 | -4.077050781 | 4.56E-05    | 0.001520271 | CD163L1  | 4.241467498 |
| 940.0301861 | -0.477061572 | 0.117606786 | -4.056411948 | 4.98E-05    | 0.00164798  | PTPRCAP  | 1.391905795 |
| 577.2863216 | -1.005790943 | 0.248209037 | -4.05219309  | 5.07E-05    | 0.001673619 | LPO      | 2.008044085 |
| 437.4764827 | -0.709005728 | 0.177785691 | -3.987979715 | 6.66E-05    | 0.002164209 | CYSTM1   | 1.634677148 |
| 2424.189013 | -0.493860442 | 0.124343374 | -3.971747162 | 7.13E-05    | 0.002305323 | GCA      | 1.408207998 |
| 7941.517258 | -0.427861066 | 0.107789375 | -3.969417825 | 7.20E-05    | 0.00232161  | ZFP36L2  | 1.345237653 |
| 4977.209802 | -0.363939451 | 0.092044755 | -3.953940149 | 7.69E-05    | 0.002458824 | STT3A    | 1.286935234 |
| 473.1962774 | -1.011317512 | 0.256007961 | -3.950336188 | 7.80E-05    | 0.002489858 | SERPINF1 | 2.015751104 |
| 290.6263641 | -0.667956662 | 0.169234376 | -3.946932511 | 7.92E-05    | 0.002519161 | PALM     | 1.588821072 |
| 516.8285642 | -0.593281822 | 0.150593815 | -3.939616126 | 8.16E-05    | 0.002584247 | TBC1D2   | 1.508674758 |
| 342.00937   | -0.683402084 | 0.173886382 | -3.930164482 | 8.49E-05    | 0.002681268 | LRP3     | 1.605922291 |
| 322.1392214 | -0.891060579 | 0.228272427 | -3.903496322 | 9.48E-05    | 0.002987317 | SIPA1L2  | 1.854538964 |
| 1948.244907 | -0.415053784 | 0.106753833 | -3.887952065 | 0.000101094 | 0.003146072 | HMGB3    | 1.333348384 |
| 4300.242017 | -0.552991236 | 0.14282027  | -3.871938038 | 0.000107973 | 0.003335588 | P2RY8    | 1.467124432 |
| 195.1518088 | -0.736018063 | 0.190257523 | -3.868535922 | 0.000109491 | 0.003349784 | STAR     | 1.665572395 |
| 1026.531373 | -0.524848167 | 0.137841309 | -3.807626107 | 0.000140307 | 0.004221214 | SPARC    | 1.43878215  |
| 497.220351  | -0.612867926 | 0.161029263 | -3.805941327 | 0.000141266 | 0.004239985 | HRH2     | 1.52929627  |
| 331.4131233 | -1.043510932 | 0.275087473 | -3.793378601 | 0.000148611 | 0.004428966 | C1QTNF4  | 2.061237768 |
| 79.98625479 | -1.551850711 | 0.41091099  | -3.77661038  | 0.000158977 | 0.004726771 | DSC2     | 2.931930105 |
| 115.9525936 | -1.127744629 | 0.300061375 | -3.758379859 | 0.000171017 | 0.005025761 | SLC47A1  | 2.185168647 |
| 1134.32068  | -0.513628311 | 0.137060308 | -3.747462096 | 0.000178633 | 0.005237415 | EBPL     | 1.427636123 |
| 347.251733  | -0.606886431 | 0.162103209 | -3.743827365 | 0.000181238 | 0.005301531 | CRYL1    | 1.522968847 |
| 4162.691614 | -0.615277098 | 0.164605395 | -3.737891452 | 0.00018557  | 0.005415737 | GPNMB    | 1.531852192 |
| 3615.597709 | -0.415628913 | 0.111353908 | -3.73250404  | 0.000189586 | 0.005520211 | LRPAP1   | 1.333880028 |
| 120.6669344 | -1.076339719 | 0.28878461  | -3.727136706 | 0.000193667 | 0.005613253 | NOG      | 2.10867933  |
| 524.1224819 | -0.767287614 | 0.206439191 | -3.716773007 | 0.000201784 | 0.005808616 | SLC1A3   | 1.702066747 |
| 649.2013183 | -0.511670896 | 0.138090889 | -3.705319727 | 0.000211124 | 0.006022747 | MEGF6    | 1.425700453 |
| 1000.931459 | -0.424157851 | 0.115595163 | -3.669339103 | 0.000243178 | 0.006844659 | SLC36A4  | 1.341789028 |
| 1481.09601  | -0.324544756 | 0.08873955  | -3.657272933 | 0.000254913 | 0.007143201 | AKAP17A  | 1.252269221 |

|             |              |             |              |             |             |          |             |
|-------------|--------------|-------------|--------------|-------------|-------------|----------|-------------|
| 300.5972586 | -0.668039863 | 0.183508739 | -3.640370844 | 0.000272246 | 0.00761206  | TIAM1    | 1.588912703 |
| 458.8667605 | -0.690227724 | 0.190505131 | -3.623145051 | 0.000291043 | 0.008031251 | SPNS2    | 1.613538189 |
| 257.4675773 | -0.703407339 | 0.194277907 | -3.620624442 | 0.000293893 | 0.008074722 | PLB1     | 1.628346062 |
| 8679.835093 | -0.503990286 | 0.139544333 | -3.611685785 | 0.000304213 | 0.008322165 | PRG2     | 1.418130487 |
| 1965.368807 | -0.382595443 | 0.106222035 | -3.601846296 | 0.000315965 | 0.008588015 | MSRB3    | 1.303685107 |
| 457.1282819 | -0.606027004 | 0.1683      | -3.600873469 | 0.00031715  | 0.008601757 | CBX2     | 1.52206187  |
| 26.61371127 | -1.570516244 | 0.436266721 | -3.599899258 | 0.00031834  | 0.0086156   | CUX2     | 2.970109755 |
| 575.1498548 | -0.443558682 | 0.123346522 | -3.596037189 | 0.000323102 | 0.008725811 | IRS2     | 1.359954781 |
| 4230.784397 | -0.755892069 | 0.210645763 | -3.588451335 | 0.000332648 | 0.008907654 | MS4A3    | 1.688675437 |
| 1731.349376 | -0.403379062 | 0.113264266 | -3.561397385 | 0.000368886 | 0.009754308 | IMPDH1   | 1.322602068 |
| 226.817042  | -0.925892014 | 0.260382432 | -3.555892798 | 0.000376698 | 0.009898864 | PRRT4    | 1.899858556 |
| 1477.17617  | -0.420155842 | 0.118617143 | -3.542117349 | 0.000396929 | 0.010392195 | MAP4K4   | 1.338072087 |
| 520.8152869 | -0.639199124 | 0.181438975 | -3.522942762 | 0.000426784 | 0.011077131 | OPN3     | 1.557464332 |
| 1672.841503 | -0.48223567  | 0.137579825 | -3.505133631 | 0.000456378 | 0.011748955 | GAPT     | 1.396906704 |
| 129.1205616 | -1.238200933 | 0.355389924 | -3.484063132 | 0.000493863 | 0.012510537 | RNASE4   | 2.35904172  |
| 51.22171352 | -1.153248987 | 0.331225691 | -3.481761888 | 0.000498126 | 0.012593352 | TSPAN15  | 2.224142134 |
| 520.0346934 | -0.50807488  | 0.146156584 | -3.476236691 | 0.000508503 | 0.012780349 | UGCG     | 1.422151223 |
| 117.2259347 | -0.875684119 | 0.254513595 | -3.440618253 | 0.000580387 | 0.014164121 | DDAH1    | 1.834877971 |
| 2275.222832 | -0.427341941 | 0.124481621 | -3.432972179 | 0.000597003 | 0.014485909 | EPX      | 1.344753683 |
| 2742.216181 | -0.343593881 | 0.100151156 | -3.430753033 | 0.000601908 | 0.014557508 | IRAK3    | 1.268913636 |
| 97.81961385 | -1.060931661 | 0.309285597 | -3.430265329 | 0.000602991 | 0.014557508 | EPAS1    | 2.08627836  |
| 545.1833319 | -0.444551885 | 0.130661496 | -3.402317428 | 0.00066817  | 0.015907968 | PLAU     | 1.360891345 |
| 3165.299526 | -0.353657472 | 0.10426473  | -3.391918542 | 0.000694051 | 0.016431488 | MAN1A1   | 1.27779595  |
| 3095.282187 | -0.287650183 | 0.085408308 | -3.367941491 | 0.000757317 | 0.017697736 | PARVG    | 1.2206505   |
| 2972.790268 | -0.306991604 | 0.091561154 | -3.352858603 | 0.000799816 | 0.018486248 | KBTBD11  | 1.237125279 |
| 853.4531679 | -0.340897184 | 0.101731606 | -3.350946636 | 0.000805358 | 0.018546667 | MGAT4A   | 1.266543989 |
| 177.7853011 | -0.598921134 | 0.178904781 | -3.347708938 | 0.000814825 | 0.0186967   | DNAJC25  | 1.514583517 |
| 21261.80949 | -0.26724012  | 0.080083515 | -3.337017884 | 0.000846825 | 0.019291161 | SERPINB1 | 1.203503319 |
| 1127.169868 | -0.40196572  | 0.120805741 | -3.327372666 | 0.00087669  | 0.019899931 | PDIA5    | 1.32130701  |
| 80.62551425 | -1.114881608 | 0.335896617 | -3.31912128  | 0.000903012 | 0.020424197 | PARM1    | 2.165772354 |
| 659.8948051 | -0.432318816 | 0.130691311 | -3.307938478 | 0.000939855 | 0.021219604 | NPDC1    | 1.3494007   |
| 1228.973721 | -0.325557016 | 0.098632532 | -3.300706269 | 0.000964418 | 0.021696834 | GOLGA8N  | 1.253148178 |
| 781.5576312 | -0.711237683 | 0.215593949 | -3.298968665 | 0.000970407 | 0.021792873 | GPR183   | 1.63720807  |
| 976.572454  | -0.586008589 | 0.177742253 | -3.296957134 | 0.000977384 | 0.021910704 | SMIM24   | 1.501088034 |
| 109170.8841 | -0.346514731 | 0.105140926 | -3.29571695  | 0.000981709 | 0.021968768 | SRGN     | 1.271485255 |
| 257.9501867 | -0.669877401 | 0.203723783 | -3.288164948 | 0.001008427 | 0.022408318 | HSPA4L   | 1.590937765 |
| 1253.581052 | -0.336124144 | 0.102691036 | -3.273159536 | 0.001063524 | 0.023423877 | FKBP2    | 1.262360653 |
| 1701.676272 | -0.440943389 | 0.135055895 | -3.264895534 | 0.001095045 | 0.023926556 | GRAMD4   | 1.357491711 |
| 2715.823213 | -0.516153832 | 0.158214723 | -3.262362829 | 0.001104876 | 0.023996317 | MANF     | 1.430137471 |
| 2035.614288 | -0.28983118  | 0.088851621 | -3.261968406 | 0.001106415 | 0.023996317 | NREP     | 1.222497217 |
| 8787.187643 | -0.435834906 | 0.133685598 | -3.260148532 | 0.001113539 | 0.024089105 | PRSS57   | 1.352693427 |
| 1331.629757 | -0.39169067  | 0.120417572 | -3.252770033 | 0.001142859 | 0.024549962 | PREB     | 1.311929932 |
| 202.2048418 | -0.571114136 | 0.175587333 | -3.252593024 | 0.001143572 | 0.024549962 | KCNK6    | 1.485670452 |
| 819.3657974 | -0.475455887 | 0.146282835 | -3.250250701 | 0.001153033 | 0.024627854 | MATK     | 1.390357499 |
| 134.8613443 | -0.723091804 | 0.222805411 | -3.245396062 | 0.001172874 | 0.025009459 | SERINC2  | 1.650715855 |
| 1589.965961 | -0.306927289 | 0.094909684 | -3.233888027 | 0.001221173 | 0.025908509 | UFC1     | 1.23707013  |
| 44.77972621 | -1.255688092 | 0.389874053 | -3.22075317  | 0.001278542 | 0.026900356 | NOV      | 2.387810079 |
| 681.6285154 | -0.897617661 | 0.278938765 | -3.21797389  | 0.001290996 | 0.02709726  | CEACAM6  | 1.86298707  |
| 330.0947492 | -0.548068864 | 0.170328804 | -3.217710997 | 0.001292179 | 0.02709726  | RGL4     | 1.462127239 |
| 23176.91543 | -0.291272527 | 0.090563629 | -3.216219694 | 0.001298914 | 0.027193453 | RPL6     | 1.223719182 |
| 204.3196861 | -0.990431322 | 0.308129523 | -3.214334386 | 0.001307473 | 0.027327483 | NDRG2    | 1.986778888 |
| 25072.08594 | -0.324972676 | 0.101142766 | -3.213009583 | 0.001313519 | 0.02740862  | HSP90B1  | 1.252640714 |

|             |              |             |              |             |             |            |             |
|-------------|--------------|-------------|--------------|-------------|-------------|------------|-------------|
| 3534.287753 | -0.312015731 | 0.097948701 | -3.185501487 | 0.001445034 | 0.029664175 | TNFRSF1A   | 1.241441028 |
| 575.4791117 | -0.380033855 | 0.119590784 | -3.177785465 | 0.001484045 | 0.030268786 | NEURL1B    | 1.301372394 |
| 1385.481938 | -0.371366415 | 0.11696856  | -3.174925067 | 0.001498752 | 0.030519602 | PRRC1      | 1.293577432 |
| 8032.41204  | -0.327752101 | 0.103451334 | -3.168176646 | 0.001533983 | 0.031034245 | FDFT1      | 1.255056316 |
| 1186.144802 | -0.382670694 | 0.121023055 | -3.161965236 | 0.001567083 | 0.031441591 | ITM2A      | 1.30375311  |
| 2760.32243  | -0.319795651 | 0.101184563 | -3.160518186 | 0.001574888 | 0.031512683 | DNAJB11    | 1.248153743 |
| 4081.43089  | -0.43331511  | 0.13715849  | -3.159229222 | 0.00158187  | 0.031577915 | NDUFB9     | 1.35033289  |
| 175.607177  | -1.004490472 | 0.319050363 | -3.148375896 | 0.001641804 | 0.032492332 | CSGALNACT1 | 2.006234814 |
| 472.8609643 | -0.465492548 | 0.148176076 | -3.141482488 | 0.001680949 | 0.033163388 | LAMC1      | 1.380788685 |
| 296.5225807 | -0.923004653 | 0.294449347 | -3.13468059  | 0.001720413 | 0.033551769 | CLDN10     | 1.896060046 |
| 825.708972  | -0.360424471 | 0.114986107 | -3.134504502 | 0.001721446 | 0.033551769 | CHCHD7     | 1.283803564 |
| 68.00488515 | -0.934989591 | 0.298811708 | -3.12902596  | 0.001753868 | 0.034071309 | STARD13    | 1.911876841 |
| 967.4483784 | -0.31059713  | 0.099507453 | -3.121345406 | 0.001800267 | 0.0348125   | DOK1       | 1.24022092  |
| 199.5314974 | -0.514868225 | 0.165561825 | -3.10982453  | 0.001871985 | 0.036062337 | C3orf62    | 1.428863622 |
| 108.0927177 | -1.652493352 | 0.531444735 | -3.109435925 | 0.001874449 | 0.036062337 | PTGER3     | 3.143764941 |
| 25851.46369 | -0.288957471 | 0.092937888 | -3.109146076 | 0.001876289 | 0.036062337 | RPL5       | 1.221757085 |
| 1232.972874 | -0.444863621 | 0.143265836 | -3.105161947 | 0.001901749 | 0.036390303 | SLC17A9    | 1.361185437 |
| 2643.974136 | -0.270886758 | 0.087238539 | -3.105127179 | 0.001901972 | 0.036390303 | SLC44A1    | 1.20654921  |
| 1988.269271 | -0.394732744 | 0.127524614 | -3.095345534 | 0.001965837 | 0.03744255  | DNAJC3     | 1.314699192 |
| 8208.995621 | -0.583157727 | 0.188536023 | -3.09308385  | 0.001980882 | 0.037555675 | AZU1       | 1.498124713 |
| 37.67716824 | -1.135093827 | 0.369016251 | -3.075999564 | 0.002097982 | 0.039425866 | AK5        | 2.196328463 |
| 183.3857002 | -1.218682322 | 0.396378223 | -3.07454409  | 0.002108246 | 0.039504119 | IL1R1      | 2.327340538 |
| 4140.275627 | -0.315711633 | 0.102692995 | -3.074324923 | 0.002109795 | 0.039504119 | SPCS3      | 1.244625434 |
| 535.4938812 | -0.39177432  | 0.127588952 | -3.070597517 | 0.002136309 | 0.039850503 | UGDH       | 1.312006002 |
| 814.8141377 | -0.3206878   | 0.104462462 | -3.06988553  | 0.002141408 | 0.039886878 | DAGLB      | 1.248925828 |
| 56.03924009 | -0.986663501 | 0.322140266 | -3.06283817  | 0.002192486 | 0.040778306 | ANKRD18A   | 1.981596879 |
| 1343.708905 | -0.445198745 | 0.145794054 | -3.053613866 | 0.002261029 | 0.041867582 | RALGAPA2   | 1.361501663 |
| 2415.38379  | -0.290883649 | 0.095497426 | -3.045984188 | 0.0023192   | 0.042820687 | WDR6       | 1.223389373 |
| 861.8268708 | -0.457982083 | 0.150899185 | -3.035020244 | 0.002405195 | 0.044279368 | DAB2       | 1.373619174 |
| 2656.10173  | -0.308809689 | 0.101798402 | -3.033541635 | 0.002417014 | 0.044366083 | OSTC       | 1.238685288 |
| 211.9922825 | -0.808149923 | 0.266410512 | -3.033476105 | 0.002417539 | 0.044366083 | FAM109A    | 1.750964608 |
| 30.53994985 | -1.373392978 | 0.452799146 | -3.033117424 | 0.002420414 | 0.044366083 | S1PR1      | 2.590791611 |
| 80.05835259 | -0.840337462 | 0.277307088 | -3.030349742 | 0.002442707 | 0.044710009 | MN1        | 1.790468903 |
| 23.71166074 | -1.602325837 | 0.530464254 | -3.02061039  | 0.002522657 | 0.045842149 | LAYN       | 3.036324191 |
| 838.6361872 | -0.311902898 | 0.103467267 | -3.01450795  | 0.002573965 | 0.046576236 | ABHD17B    | 1.241343939 |
| 888.2212532 | -0.421577415 | 0.139850155 | -3.014493726 | 0.002574085 | 0.046576236 | PITPNM1    | 1.339391219 |
| 1011.018654 | -0.319495889 | 0.106425798 | -3.00205303  | 0.002681655 | 0.048453405 | TM9SF1     | 1.24789443  |
| 1692.415061 | -0.350273071 | 0.116975518 | -2.994413496 | 0.00274973  | 0.04954208  | ICAM3      | 1.274801897 |
| 2052.173483 | -0.263254535 | 0.087938294 | -2.993627946 | 0.002756819 | 0.049599245 | DOK3       | 1.200183112 |

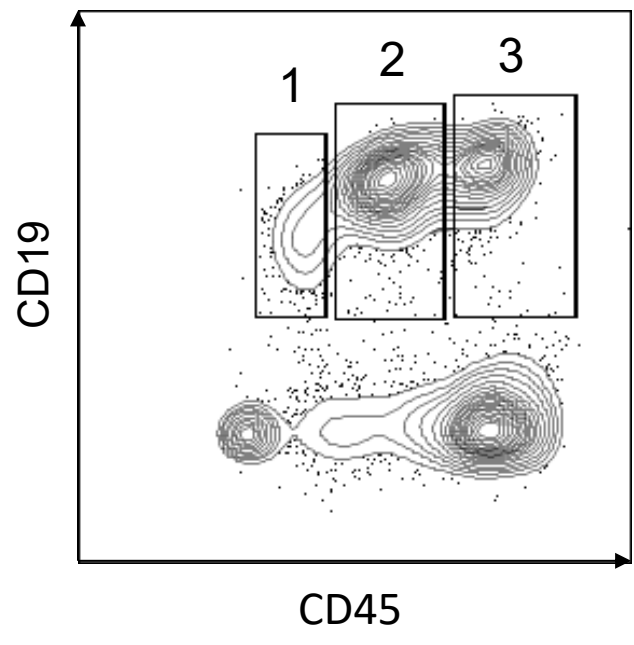

**Supplemental Figure 1. Gating of hematogones in bone marrow of patient samples.** Representative flow cytometry plot showing gating for Stage 1 (CD19+CD45<sup>dim</sup>), Stage 2 (CD19+CD45<sup>intermediate</sup>), and Stage 3 (CD19+CD45<sup>bright</sup>) hematogones in a patient sample.

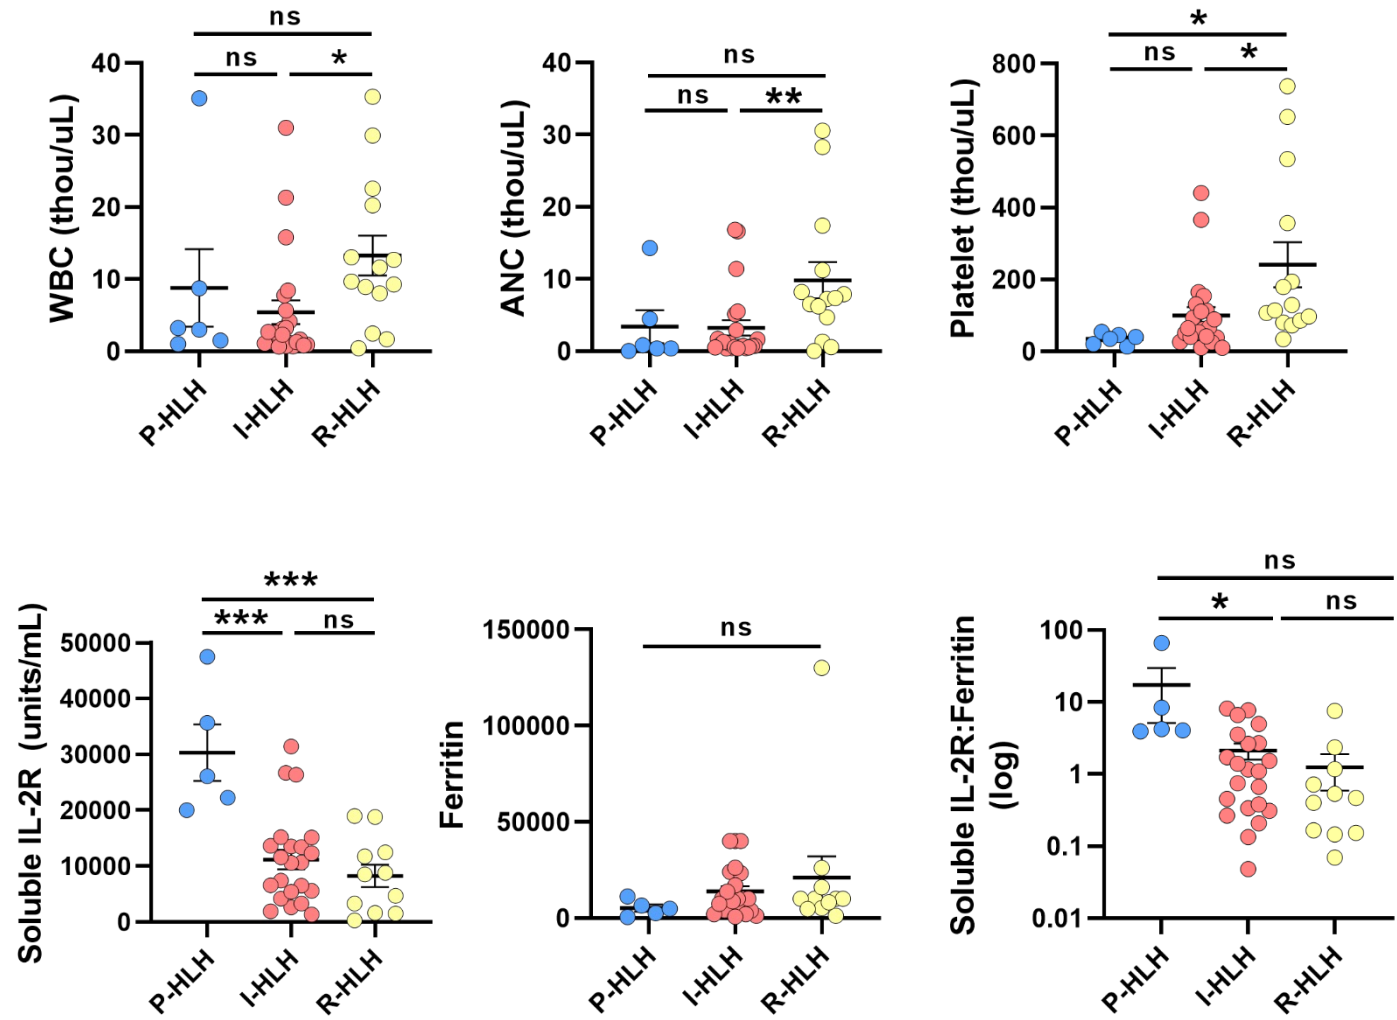

**Supplemental Figure 2. Laboratory data obtained surrounding the time of bone marrow sampling in patient groups.** For WBC, ANC, Platelet counts: P-HLH group, n= 6; I-HLH group, n=20; R-HLH group, n=14. For ferritin and soluble IL-2R: P-HLH group, n= 5; I-HLH group, n=22; R-HLH group, n=11. Kruskal-Wallis 1-way ANOVA followed by Dunn’s multiple comparison test for non-normally distributed samples and ordinary 1-way ANOVA followed by Tukey’s multiple comparison test for normally distributed samples were used for statistical comparison amongst groups. Data represent mean ± SEM; \*, p < 0.05; \*\*, p < 0.01; \*\*\*, p < 0.001; \*\*\*\*, p < 0.0001; ns, not significant.

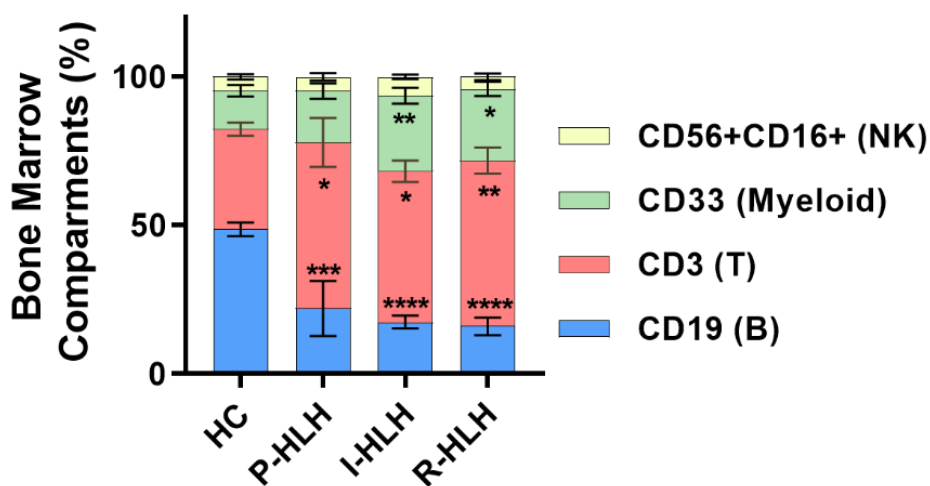

**Supplemental Figure 3. Bone marrow compartment characterization.** The individual percentages of CD19+ (B cell lineage), CD3+ (T cell lineage), CD33+ (myeloid lineage), and CD56+CD16+ (NK cell lineage) cells in the bone marrow compartment were normalized to the total percentages of these cells for healthy control (HC) group (n=8), P-HLH group (n=5), I-HLH group (n=19), R-HLH group (n=12). B cell compartment (HC 48.67 ± 2.38%, P-HLH 22.01 ± 9.30%, I-HLH 17.45 ± 2.21%, and R-HLH 16.03 ± 3.02%); T cell compartment (HC 33.73 ± 2.16%, P-HLH 55.92 ± 8.28%, I-HLH 50.76 ± 3.58%, and R-HLH 55.80 ± 4.40%); myeloid compartment (HC 12.89 ± 1.94%, P-HLH 17.30 ± 2.57%, I-HLH 25.48 ± 2.63%, and R-HLH 24.11 ± 2.44%); NK cell compartment (HC 4.71 ± 0.86%, P-HLH 4.76 ± 1.28%, I-HLH 6.30 ± 0.73%, and R-HLH 4.07 ± 1.08%). Kruskal-Wallis 1-way ANOVA followed by Dunn's multiple comparison test for non-normally distributed samples and ordinary 1-way ANOVA followed by Tukey's multiple comparison test for normally distributed samples were used for statistical comparison amongst groups. Data represent mean ± SEM; \*, p < 0.05; \*\*, p < 0.01; \*\*\*, p < 0.001; \*\*\*\*, p < 0.0001; ns, not significant.

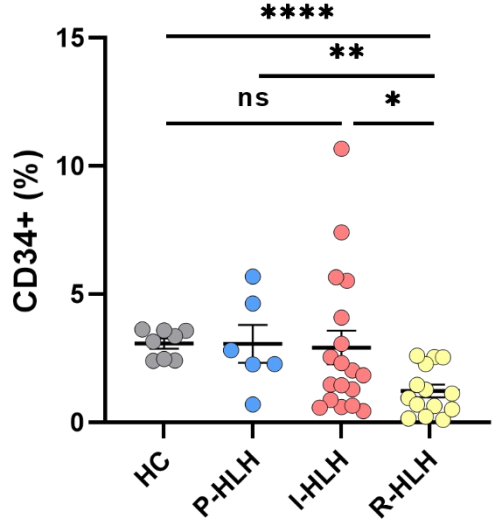

**Supplemental Figure 4. CD34+ cell population in patients with HLH.** Percentage of CD34+ cells identified in bone marrows of patients from each group. Healthy Control (HC) (n=8) 3.07 ± 0.20 %, P-HLH (n=6) 3.06 ± 0.74%, I-HLH (n=18) 2.91 ± 0.66%, and R-HLH (n=14) 1.22 ± 0.25%. (Kruskal-Wallis 1-way ANOVA followed by Dunn’s multiple comparison test for non-normally distributed samples and ordinary 1-way ANOVA followed by Tukey’s multiple comparison test for normally distributed samples were used for statistical comparison amongst groups. Data represent mean ± SEM; \*, p < 0.05; \*\*, p < 0.01; \*\*\*, p < 0.001; \*\*\*\*, p < 0.0001; ns, not significant.





**Supplemental Data**

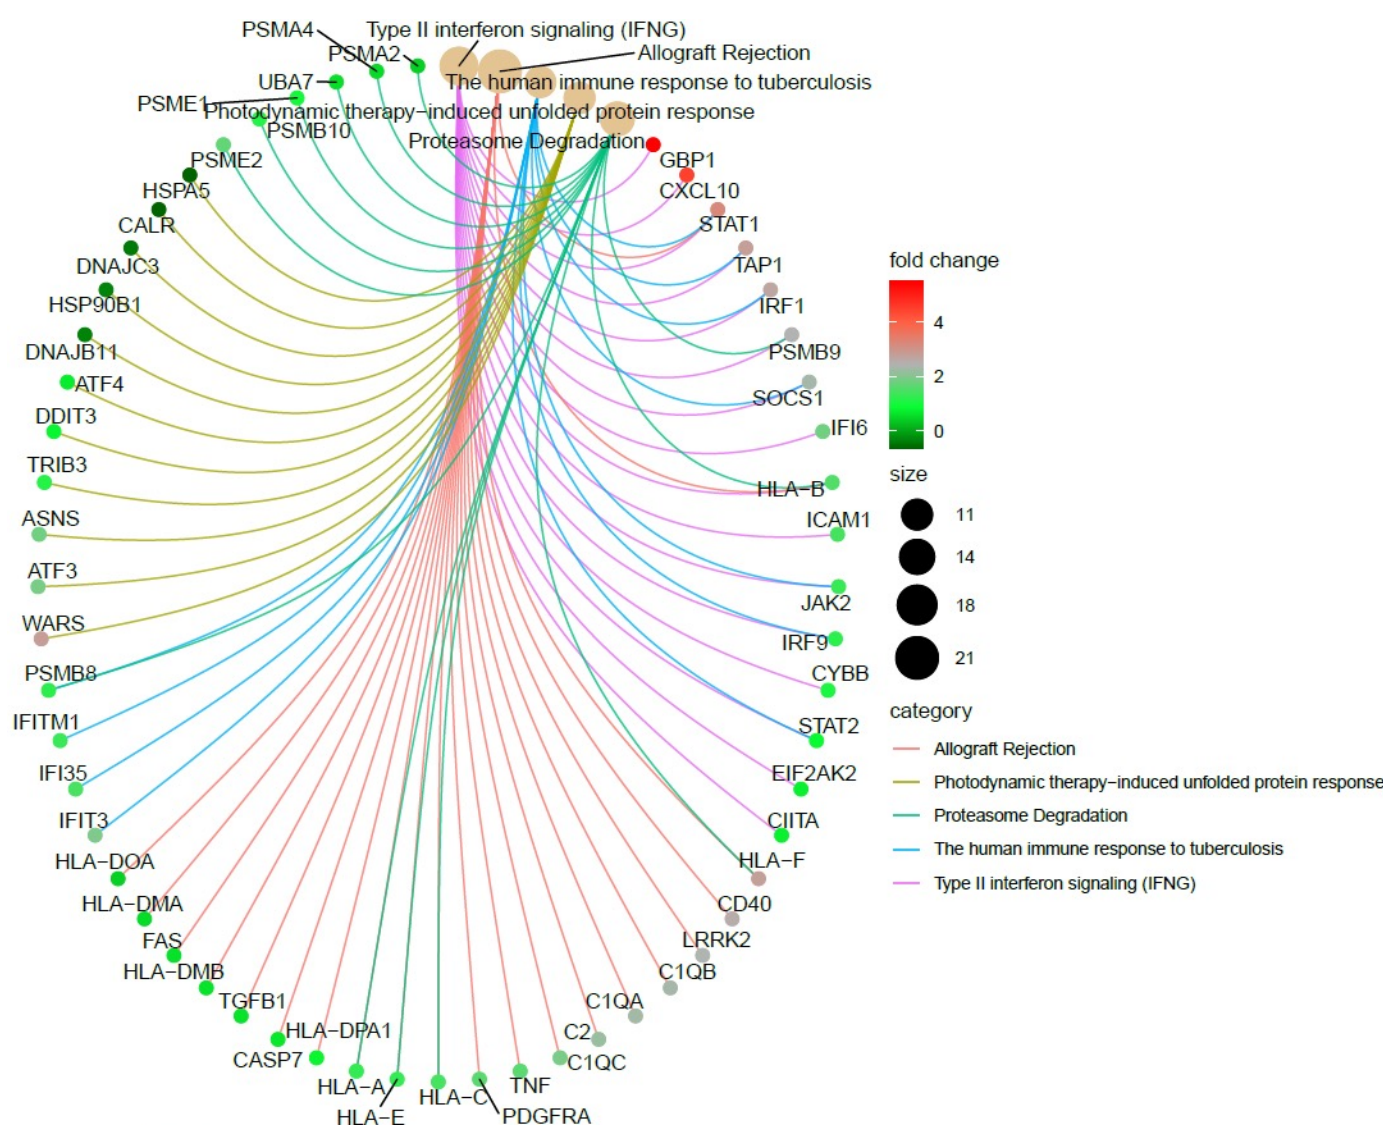

**Supplemental Figure 6.** The DE genes for some of the WikiPathways are expanded to show their expression in different pathways.

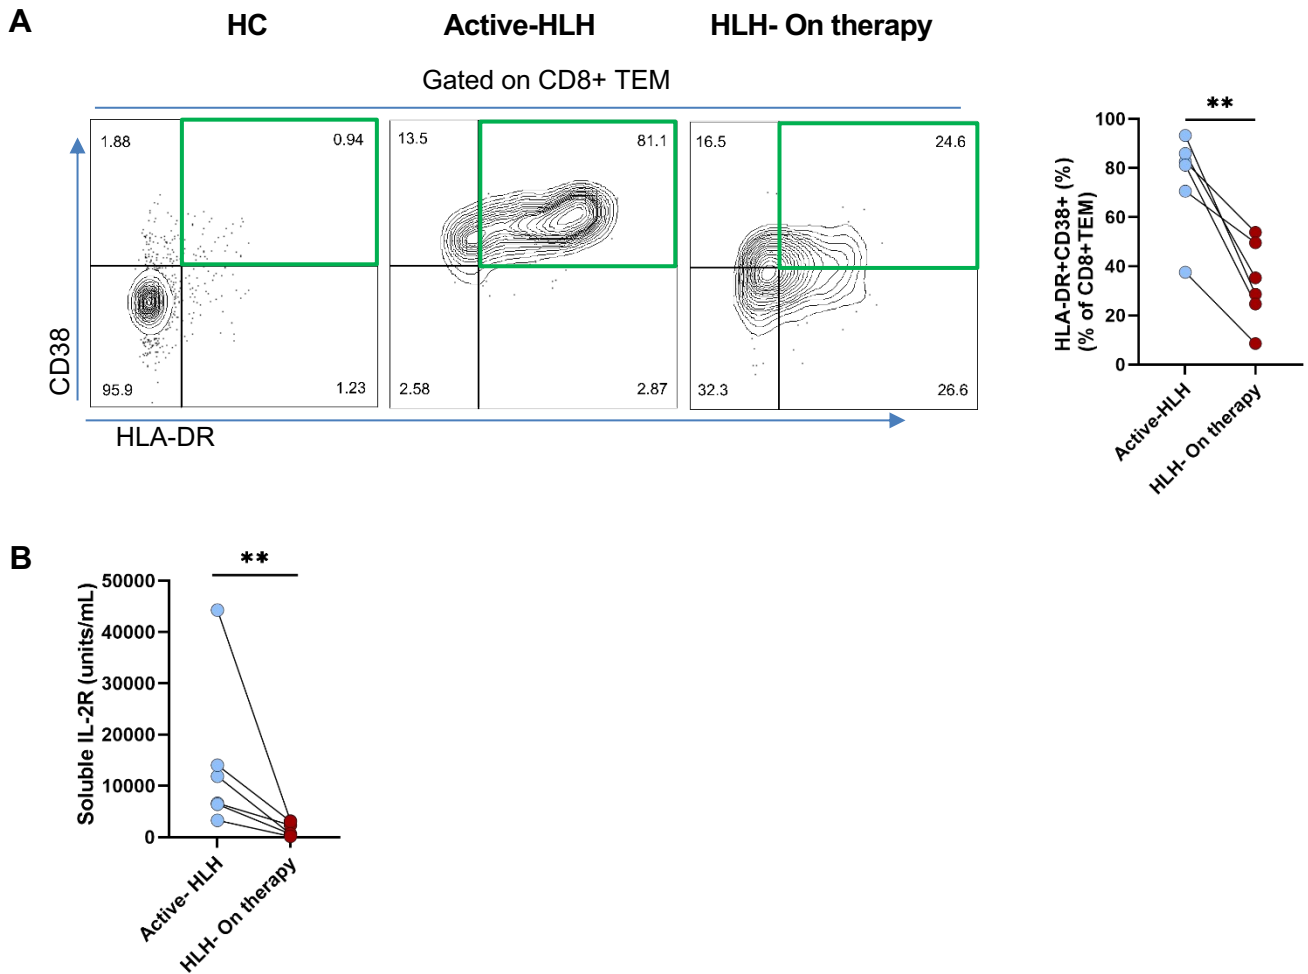

**Supplemental Figure 7. T cell activation decreases during HLH therapy.** (A) Flow cytometry analysis of peripheral blood mononuclear cells from healthy control (HC) and patients with active HLH and on therapy (P-HLH, n=5; I-HLH, n=1; Total, n=6). Gated on CD8+ effector memory T cells (TEM) to analyze CD38+HLA-DR+ population (green rectangle) representing T cell activation (left). (B) Quantitative soluble IL-2R values obtained at diagnosis and beginning of therapy and at a later time point towards end of therapy in same group of patients. Two-tailed Student's t-test or Mann-Whitney test was used depending on normality for statistical comparison between two groups. Data represent mean  $\pm$  SEM; \*, p < 0.05; \*\*, p < 0.01; \*\*\*, p < 0.001; \*\*\*\*, p < 0.0001; ns, not significant.

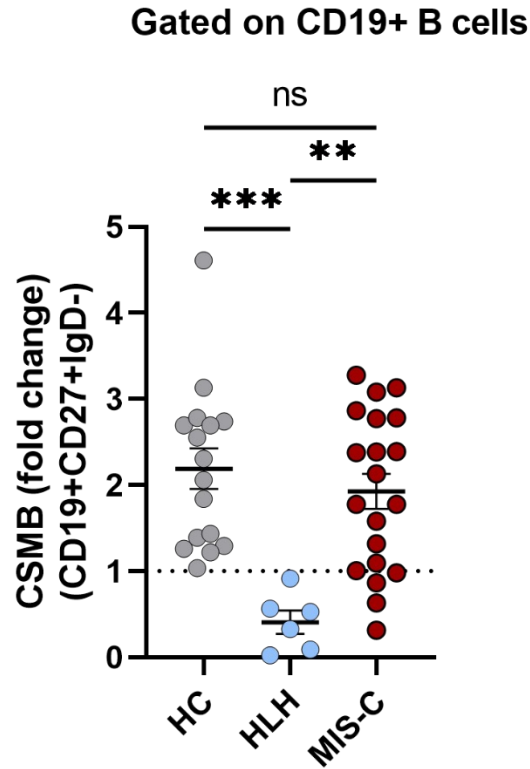

**Supplemental Figure 8. CSMB cells are not affected in MIS-C.** Age-normalized values of class switched memory B cells (CSMB, CD19+CD27+IgD-) represented as fold change were determined in the peripheral blood of healthy controls (HC) (n=16;  $2.19 \pm 0.24$ ) vs. patients with HLH (P-HLH, n=5; I-HLH, n=1; Total, n=6;  $0.41 \pm 0.14$ ) vs. patients with MIS-C (n=20;  $1.93 \pm 0.21$ ). Kruskal-Wallis 1-way ANOVA followed by Dunn's multiple comparison test for non-normally distributed samples and ordinary 1-way ANOVA followed by Tukey's multiple comparison test for normally distributed samples were used for statistical comparison amongst groups. Data represent mean  $\pm$  SEM; \*, p < 0.05; \*\*, p < 0.01; \*\*\*, p < 0.001; \*\*\*\*, p < 0.0001; ns, not significant.



A

Lymph Node

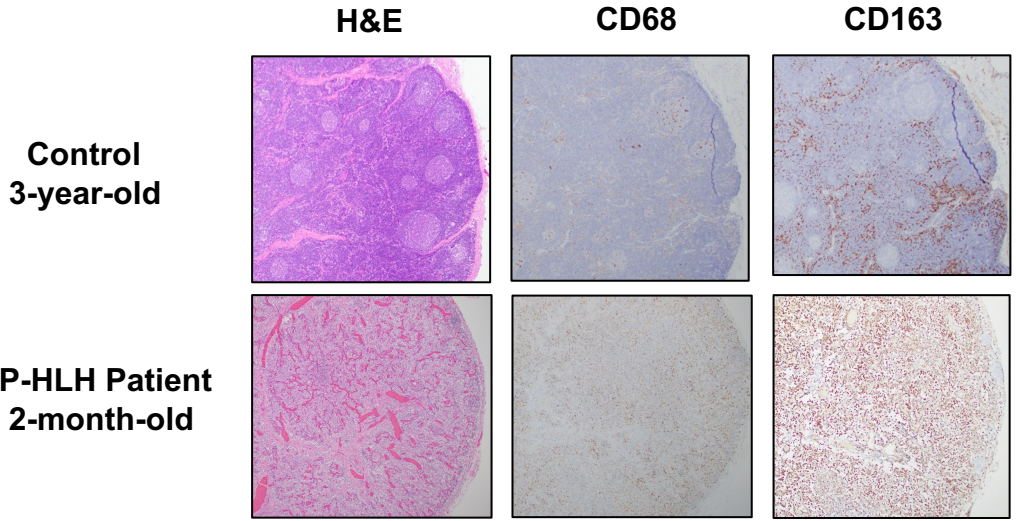

400 μm

B

Spleen

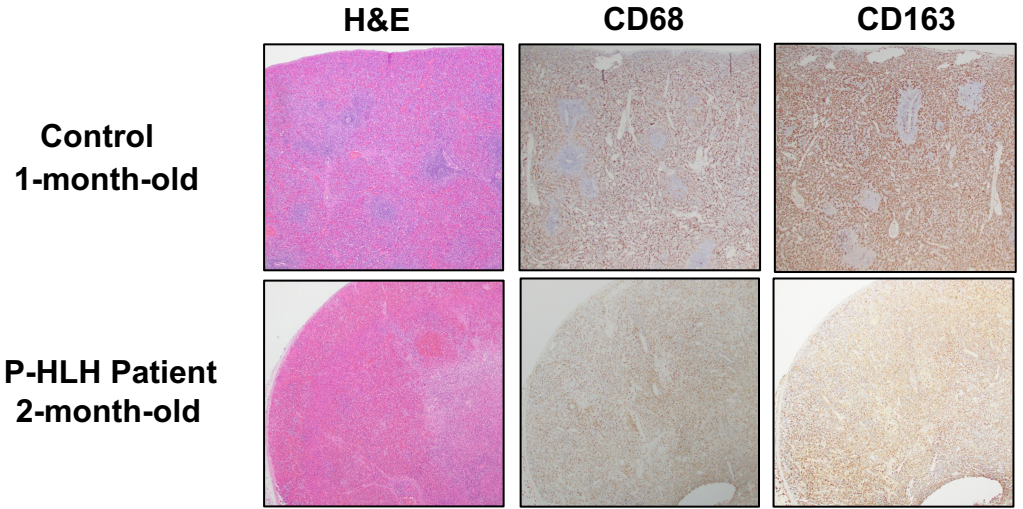

400 μm

C

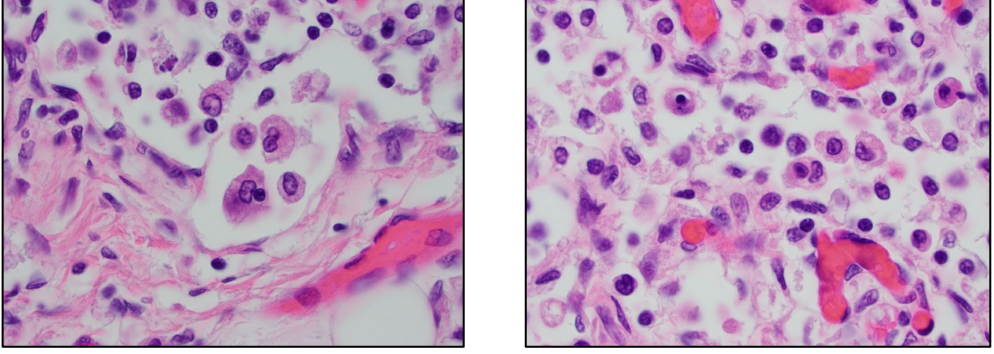

**Supplemental Figure 9. Immunohistochemistry of lymph nodes and spleen of healthy controls and patient with P-HLH.** Panel showing IHC (H&E, CD68, and CD163) images from (A) lymph node and (B) spleen of controls and a patient with active P-HLH. Scale bar represents 400 μm. (C) Hemophagocytosis (100x) shown in H&E stain of lymph node from patient with active P-HLH.
